# Supplementary material for: Vitamin D and human health: evidence from Mendelian randomization studies
Source: Springer Nature journal article supplement (doi:10.1007/s10654-023-01075-4), 2024-01-12

# European Journal of Epidemiology

## Association between vitamin D and human health: evidence from Mendelian randomization studies

--Manuscript Draft--

|                                                                   |                                                                                                                                                                                                                                                                                                                                                                                                                                                                                                                                                                                                                                                                                                                                                                                                                                                                                                                                                          |                                                         |                 |                                                                   |                 |
|-------------------------------------------------------------------|----------------------------------------------------------------------------------------------------------------------------------------------------------------------------------------------------------------------------------------------------------------------------------------------------------------------------------------------------------------------------------------------------------------------------------------------------------------------------------------------------------------------------------------------------------------------------------------------------------------------------------------------------------------------------------------------------------------------------------------------------------------------------------------------------------------------------------------------------------------------------------------------------------------------------------------------------------|---------------------------------------------------------|-----------------|-------------------------------------------------------------------|-----------------|
| <b>Manuscript Number:</b>                                         |                                                                                                                                                                                                                                                                                                                                                                                                                                                                                                                                                                                                                                                                                                                                                                                                                                                                                                                                                          |                                                         |                 |                                                                   |                 |
| <b>Full Title:</b>                                                | Association between vitamin D and human health: evidence from Mendelian randomization studies                                                                                                                                                                                                                                                                                                                                                                                                                                                                                                                                                                                                                                                                                                                                                                                                                                                            |                                                         |                 |                                                                   |                 |
| <b>Article Type:</b>                                              | Review                                                                                                                                                                                                                                                                                                                                                                                                                                                                                                                                                                                                                                                                                                                                                                                                                                                                                                                                                   |                                                         |                 |                                                                   |                 |
| <b>Keywords:</b>                                                  | Vitamin D; 25-hydroxyvitamin D; Mendelian randomization; systematic review; meta-analysis                                                                                                                                                                                                                                                                                                                                                                                                                                                                                                                                                                                                                                                                                                                                                                                                                                                                |                                                         |                 |                                                                   |                 |
| <b>Corresponding Author:</b>                                      | Edward Giovannucci<br>Harvard University<br>UNITED STATES                                                                                                                                                                                                                                                                                                                                                                                                                                                                                                                                                                                                                                                                                                                                                                                                                                                                                                |                                                         |                 |                                                                   |                 |
| <b>Corresponding Author Secondary Information:</b>                |                                                                                                                                                                                                                                                                                                                                                                                                                                                                                                                                                                                                                                                                                                                                                                                                                                                                                                                                                          |                                                         |                 |                                                                   |                 |
| <b>Corresponding Author's Institution:</b>                        | Harvard University                                                                                                                                                                                                                                                                                                                                                                                                                                                                                                                                                                                                                                                                                                                                                                                                                                                                                                                                       |                                                         |                 |                                                                   |                 |
| <b>Corresponding Author's Secondary Institution:</b>              |                                                                                                                                                                                                                                                                                                                                                                                                                                                                                                                                                                                                                                                                                                                                                                                                                                                                                                                                                          |                                                         |                 |                                                                   |                 |
| <b>First Author:</b>                                              | Aiping Fang                                                                                                                                                                                                                                                                                                                                                                                                                                                                                                                                                                                                                                                                                                                                                                                                                                                                                                                                              |                                                         |                 |                                                                   |                 |
| <b>First Author Secondary Information:</b>                        |                                                                                                                                                                                                                                                                                                                                                                                                                                                                                                                                                                                                                                                                                                                                                                                                                                                                                                                                                          |                                                         |                 |                                                                   |                 |
| <b>Order of Authors:</b>                                          | Aiping Fang<br>Yue Zhao<br>Ping Yang<br>Xuehong Zhang<br>Edward L. Giovannucci                                                                                                                                                                                                                                                                                                                                                                                                                                                                                                                                                                                                                                                                                                                                                                                                                                                                           |                                                         |                 |                                                                   |                 |
| <b>Order of Authors Secondary Information:</b>                    |                                                                                                                                                                                                                                                                                                                                                                                                                                                                                                                                                                                                                                                                                                                                                                                                                                                                                                                                                          |                                                         |                 |                                                                   |                 |
| <b>Funding Information:</b>                                       | <table border="1"><tr><td>National Natural Science Foundation of China (81803219)</td><td>Dr. Aiping Fang</td></tr><tr><td>Natural Science Foundation of Guangdong Province (2018A030310335)</td><td>Dr. Aiping Fang</td></tr></table>                                                                                                                                                                                                                                                                                                                                                                                                                                                                                                                                                                                                                                                                                                                   | National Natural Science Foundation of China (81803219) | Dr. Aiping Fang | Natural Science Foundation of Guangdong Province (2018A030310335) | Dr. Aiping Fang |
| National Natural Science Foundation of China (81803219)           | Dr. Aiping Fang                                                                                                                                                                                                                                                                                                                                                                                                                                                                                                                                                                                                                                                                                                                                                                                                                                                                                                                                          |                                                         |                 |                                                                   |                 |
| Natural Science Foundation of Guangdong Province (2018A030310335) | Dr. Aiping Fang                                                                                                                                                                                                                                                                                                                                                                                                                                                                                                                                                                                                                                                                                                                                                                                                                                                                                                                                          |                                                         |                 |                                                                   |                 |
| <b>Abstract:</b>                                                  | <p><b>Objective</b></p> <p>To summarize the current evidence on the association between vitamin D and major health outcomes from Mendelian randomization (MR) studies.</p> <p><b>Methods</b></p> <p>PubMed and Embase were searched for original MR studies on vitamin D in relation to any health outcome from inception to September 1, 2022. Meta-analysis was performed to synthesize study-specific estimates after excluding overlapping samples, where applicable. Methodological quality of the included studies was evaluated according to essential elements of the MR design.</p> <p><b>Results</b></p> <p>A total of 133 MR publications were eligible for inclusion for qualitative analyses. After excluding overlapping populations, 93 MR publications were left for quantitative analyses. The causal association between vitamin D status and 275 individual outcomes was examined. Linear MR analyses showed genetically high 25-</p> |                                                         |                 |                                                                   |                 |

hydroxyvitamin D (25(OH)D) concentrations were associated with reduced risk of multiple sclerosis incidence and relapse, non-infectious uveitis and scleritis, psoriasis, femur fracture, leg fracture, amyotrophic lateral sclerosis, anorexia nervosa, delirium, heart failure, ovarian cancer, non-alcoholic fatty liver disease, dyslipidemia, and bacterial pneumonia, but increased risk of Behçet's disease, Graves' disease, kidney stone disease, fracture of radius/ulna, basal cell carcinoma, and overall cataracts. Nonlinear MR analyses demonstrated that the inverse association of genetically predisposed 25(OH)D concentrations with the risk of cardiovascular diseases, dementia, and death from any cause, cancer, cardiovascular, and other causes was only pronounced in vitamin D-deficient individuals (especially 25(OH)D <25 nmol/L). The methodological quality of the included MR studies was substantially heterogeneous.

#### Conclusions

Current evidence from MR studies supports a causal role of vitamin D in human health.

[Click here to view linked References](#)

**Title:** Association between vitamin D and human health: evidence from Mendelian randomization studies

**Authors:** Aiping Fang<sup>1,2</sup>, Yue Zhao<sup>1</sup>, Ping Yang<sup>3,4</sup>, Xuehong Zhang<sup>2,5</sup>, Edward L. Giovannucci<sup>2,5,6</sup>

<sup>1</sup> Department of Nutrition, Guangdong Provincial Key Laboratory of Food, Nutrition and Health, School of Public Health, Sun Yat-sen University, Guangzhou, China;

<sup>2</sup> Department of Nutrition, Harvard T.H. Chan School of Public Health, Boston, MA, USA;

<sup>3</sup> School of Nursing, Peking University, Beijing, China;

<sup>4</sup> School of Nursing, Johns Hopkins University, Baltimore, MD, USA;

<sup>5</sup> Channing Division of Network Medicine, Department of Medicine, Brigham and Women's Hospital and Harvard Medical School, Boston, MA, USA;

<sup>6</sup> Department of Epidemiology, Harvard T.H. Chan School of Public Health, Boston, MA, USA.

**Corresponding author:**

Edward L. Giovannucci, MD, ScD.

Department of Nutrition, Harvard T.H. Chan School of Public Health, Building 2, 3rd Floor, 655 Huntington Avenue, Boston, MA 02115, USA.

Phone: 617-432-4648; Fax: 617-432-2435; E-mail: [egiovann@hsph.harvard.edu](mailto:egiovann@hsph.harvard.edu).

**Abbreviations:**

25(OH)D: 25-hydroxyvitamin D; 1,25(OH)2D: 1,25-dihydroxyvitamin D; ALS: amyotrophic lateral sclerosis; BCC: basal cell carcinoma; CAD: coronary artery disease; CHD: coronary heart disease; CI: confidence interval; CVD: cardiovascular disease; FIND: Finnish Vitamin D Trial; GI: genetic instrument; GWAS: genome-wide association study; HF: heart failure; HR: hazard ratio; IV: instrumental variable; KSD: kidney stone disease; MI: myocardial infarction; MR: Mendelian randomization; MS: multiple sclerosis; NAFLD: nonalcoholic fatty liver disease; OR: odds ratio; RCT: randomized controlled trial; SD: standard deviation; SE: standard error; SNP: single nucleotide polymorphisms; T2D: type 2 diabetes; UKB: UK Biobank; VDR: vitamin D receptor; ViDA: Vitamin D Assessment Study; VITAL: Vitamin D and Omega-3 Trial.

## **ABSTRACT**

### **Objective**

To summarize the current evidence on the association between vitamin D and major health outcomes from Mendelian randomization (MR) studies.

### **Methods**

PubMed and Embase were searched for original MR studies on vitamin D in relation to any health outcome from inception to September 1, 2022. Meta-analysis was performed to synthesize study-specific estimates after excluding overlapping samples, where applicable. Methodological quality of the included studies was evaluated according to essential elements of the MR design.

### **Results**

A total of 133 MR publications were eligible for inclusion for qualitative analyses. After excluding overlapping populations, 93 MR publications were left for quantitative analyses. The causal association between vitamin D status and 275 individual outcomes was examined. Linear MR analyses showed genetically high 25-hydroxyvitamin D (25(OH)D) concentrations were associated with reduced risk of multiple sclerosis incidence and relapse, non-infectious uveitis and scleritis, psoriasis, femur fracture, leg fracture, amyotrophic lateral sclerosis, anorexia nervosa, delirium, heart failure, ovarian cancer, non-alcoholic fatty liver disease, dyslipidemia, and bacterial pneumonia, but increased risk of Behçet's disease, Graves' disease, kidney stone disease, fracture of radius/ulna, basal cell carcinoma, and overall cataracts. Nonlinear MR analyses demonstrated that the inverse association of genetically predisposed 25(OH)D concentrations with the risk of cardiovascular diseases, dementia, and death from any cause, cancer, cardiovascular, and other causes was only pronounced in vitamin D-deficient individuals (especially 25(OH)D <25 nmol/L). The methodological quality of the included MR studies was substantially heterogeneous.

### **Conclusions**

Current evidence from MR studies supports a causal role of vitamin D in human health.

### **Keywords**

Vitamin D, 25-hydroxyvitamin D, Mendelian randomization, systematic review, meta-analysis

## INTRODUCTION

Vitamin D is the precursor of 1,25-dihydroxyvitamin D (1,25(OH)<sub>2</sub>D or calcitriol), a potent steroid hormone involved in regulating calcium and phosphate homeostasis(1). 1,25(OH)<sub>2</sub>D directly or indirectly controls 3%-5% of the human genome at the transcriptional level through binding to the nuclear vitamin D receptor (VDR), exerting a broad spectrum of classical and nonclassical actions such as regulation of cell proliferation, cell apoptosis, cell differentiation, and immune function(2-4). VDR is widely expressed throughout the human body(5). Additionally, CYP27B1 (1 $\alpha$ -hydroxylase), the enzyme responsible for the synthesis of 1,25(OH)<sub>2</sub>D from 25-hydroxyvitamin D (25(OH)D), is present in multiple extrarenal sites, suggesting vitamin D can function in an autocrine, intracrine or paracrine manner(6). Therefore, it is physiologically plausible that vitamin D may play a potential role in the prevention and treatment of a wide range of human diseases. However, to date, no consensus has been reached on whether vitamin D causally affects skeletal and extraskeletal diseases(7-10), except for nutritional rickets in infants and children(11).

Mendelian randomization (MR) studies provide an alternative approach to facilitate causal inference on exposure-outcome associations in a cost-effective and timely manner(12). MR analyses are performed in an observational setting while minimizing biases due to residual confounding, reverse causality, and exposure misclassification by using genetic variants as proxies for exposure(13). Vitamin D is primarily synthesized by the human body through the action of ultraviolet radiation in sunlight and most unfortified foods contain little vitamin D(2). Several large-scale genome-wide association studies (GWASs) have discovered a number of single nucleotide polymorphisms (SNPs) that are strongly and robustly associated with vitamin D status, measured by circulating 25(OH)D concentrations, including those around the genes involved in vitamin D synthesis, metabolism, and transport.(14-19) Using such genetic instruments (GI), a wealth of MR studies has investigated the association of genetically predisposed 25(OH)D concentrations with various health outcomes. Summarizing these available evidence will provide an overarching view of promising areas for vitamin D intervention in public health nutrition. Although a few researchers have qualitatively reviewed the findings of vitamin D and different diseases from MR studies(8-10, 20, 21), the number of eligible studies has doubled since their studies were published, which provides an opportunity to elucidate the causal relation of vitamin D for a broader range of health outcomes. Furthermore, individual MR studies have yielded conflicting results for some outcomes. Additionally, a systematic evaluation of the methodological quality of these studies is still lacking.

In this paper, we aimed to 1) provide an overview of the current evidence on the association between vitamin D and multiple health outcomes in an MR framework, 2) if possible, perform meta-analyses to synthesize relevant evidence after excluding overlapping study populations, and 3) assess the methodological quality of the available MR studies.

## **METHODS**

The present review was conducted following the Preferred Reporting Items for Systematic Reviews and Meta-Analysis (PRISMA) statement(22) and the Strengthening the Reporting of Observational Studies in Epidemiology using Mendelian Randomization (STROBE-MR) statement(23). The protocol was registered on the protocol.io(24).

### **Literature search**

We systematically searched PubMed and Embase from inception to September 1, 2022, for published, peer-reviewed MR studies using GIs as proxies for vitamin D status in relation to any health outcome. The key search terms are ('vitamin D' OR '25-hydroxyvitmain D') AND ('Mendelian randomization' OR 'Mendelian randomisation'); see Table S1. We also manually screened the reference lists of relevant reviews and the included studies to identify additional studies. Two investigators (AF, YZ) independently screened the titles and abstracts of all retrieved studies and subsequently reviewed the full text of potentially eligible studies in Covidence software. Any discrepancy was resolved by discussion.

### **Eligibility criteria**

This study focused on the associations of vitamin D with major health outcomes from MR design. We excluded: 1) duplicate publications; 2) non-original articles, e.g., reviews, conference abstracts, editorials, commentaries, correspondences, opinions, corrections, and study proposals; 3) methodological studies that used vitamin D as an example of the application of MR; 4) studies that used vitamin D status as an outcome; 5) studies that did not provide sufficient original data, i.e., effect size and 95% confidence intervals (CIs) or standard error (SE) for the studied association; 6) studies that only reported single variant–outcome associations; 7) studies only using variants in the vitamin D-binding protein gene as instrumental variables (e.g., rs2282679, rs7041 in the *GC* gene); and 8) studies that only employed biomarkers or surrogate endpoints (e.g., serum lipids, bone mineral density) as outcomes.

### **Data extraction**

We extracted the following information from the eligible MR studies using a predefined Excel template: first author's name, year of publication, MR design (one-sample or two-sample); exposure and outcome of interest, sample size, data source and ancestry of exposure and outcome populations, adjustments for exposure and outcome analysis; GI used (gene name, number of SNPs, specific SNPs), GI type (single SNP/allele, multiple SNPs in a single analysis, multiple SNPs in separate analyses, combination of SNPs, genetic risk score/allele score)(25), selection criteria for the GIs (percentage of variance explained by the GI, F-statistic, *P*-value threshold for genetic variant selection, threshold for linkage disequilibrium, biological relevance), statistical power of the GI and the corresponding effect estimate; type of instrumental variable (IV) analysis (formal or reduced IV analysis), unit of estimated effect, analytical method, effect metric [odds ratio (OR), hazard ratio (HR), beta, etc.],

effect size and the corresponding 95% CIs (if only SEs were presented, the values were converted to 95% CIs by the investigators), *P*-value, and Cochran's Q-statistic and I-square statistic ( $I^2$ ) for heterogeneity of the GI (meta-analysis of individual SNPs) for the main analysis as defined by the authors. We also extracted sensitivity analyses results derived from different statistical approaches (e.g., MR-Egger, weighted median, weighted mode, MR-PRESSO, multivariable MR) or different sets of genetic variants and subgroups. We extracted *P*-values for the intercept of MR-Egger and for the MR-PRESSO global, outlier, and distortion tests to assess horizontal pleiotropy. For studies that performed nonlinear MR, we further extracted information on the analytical approach of nonlinear MR, curve shape, reference and threshold levels of 25(OH)D, and *P*-value for the nonlinearity. All data in each study were retrieved by one investigator (AF, YZ) and then double-checked by another investigator (AF, YZ, PY).

### **Quantitative analysis**

When more than one GI was used for an identical outcome based on the same participants in one study, we only kept the record for the primary analysis. When one study reported MR estimates for an identical outcome from different outcome population sources, we kept all the records. If two or more studies were published on an identical outcome using GWAS data from the same study population, we gave priority to the study that conducted formal IV analysis. Otherwise, we included the publication with the largest sample size or with the greatest proportion of variance explained by the GI (if the sample size was the same). We further performed meta-analyses to combine estimates from a minimum of two non-overlapping samples for an identical outcome on the same scale. Since different units of estimated effect were used in different studies, we first converted MR estimates to the same scale (e.g., per 25 nmol/L increase in serum 25(OH)D levels, per SD increase in natural log-transformed serum 25(OH)D levels ( $\log(25(OH)D)$ ) before conducting meta-analysis. The heterogeneity among studies was quantified with the  $I^2$  statistic.  $I^2 \geq 50\%$  was considered high heterogeneity, in which case random-effects models were used; if not, fixed-effect models were adopted. Meta-analyses were performed using the 'meta' package, and forest plots were generated using the 'forestplot' package (R software version 4.1.3). A two-tailed *P* value  $< 0.05$  was considered statistically significant.

### **Evaluation of methodological quality**

Currently, no widely-accepted tools are available for systematic reviews of MR studies.(26) Thus, we developed a scoring system targeted to MR studies to assess the methodological quality of the included studies according to the published guidelines(23, 26-28). The scoring system has 11 items, including type of IV analysis, three core IV assumptions, population heterogeneity, GI selection, results reporting, sensitivity analysis, and dose-response relationship (Supplementary Methods). The standards for scoring each item are described in detail in Table S2.

## **RESULTS**

### **Literature search and study selection**

The search yielded a total of 627 publications, including 617 from electronic databases and 10 through manual search. After removing duplicates (n=242) and irrelevant articles (n=211), 174 MR publications reporting results of vitamin D with one or more health outcomes were identified. Of them, 41 reports were further excluded because of not providing original data, only presenting single SNP-outcome associations, merely using SNPs in GC gene as GI, or using surrogate endpoints as the outcome, leading to 133 eligible MR articles(17, 18, 20, 29-158) in qualitative analysis. In quantitative analysis, an additional 40 publications were removed because of overlapping or same outcome populations, leaving 93 publications(17, 18, 20, 29, 33, 35, 37, 40, 43-46, 48, 49, 52-54, 56, 57, 59-61, 63-66, 68, 69, 71-73, 75, 76, 78-85, 87, 89, 90, 92, 94, 96, 97, 99, 101, 103, 104, 108, 109, 113-119, 122-143, 145, 147, 149, 150, 152, 153, 155-158). An overview of the search and selection process is presented in Fig. S3.

### **Study description**

The included MR articles were published between 2012 and 2022, with 76 (57.1%) published after 2020. A total of 92 (69.2%) publications adopted two-sample MR design, 34 (25.6%) publications used one-sample MR approach, and the remaining 7 (5.3%) publications performed both one-sample and two-sample MR analyses. There was a growing trend of applying the two-sample MR design (Fig. S4). All the publications employed circulating total 25(OH)D concentrations as exposure, 2 (1.5%) publications further used serum 25(OH)D<sub>3</sub> concentrations as exposure, 1 (0.8%) publication used C3-epi-25(OH)D<sub>3</sub> (above vs below lower limit of quantification) as exposure, 1 (0.8%) publication additionally used vitamin D deficiency [serum 25(OH)D < 25 nmol/L] as exposure, and another 2 (1.5%) publications used vitamin D deficiency [serum 25(OH)D < 50 nmol/L] and vitamin D insufficiency [serum 25(OH)D < 75 nmol/L] as exposures. The number of genetic variants selected as GIs ranged from 2 to 288, explaining up to 17.5% of the phenotypic variance. Most studies obtained GIs for vitamin D status from the SUNLIGHT consortium(14, 15) or UK Biobank (UKB)(16, 17). In total, 275 individual health outcomes were reported, including 16 all-cause and cause-specific mortality outcomes, 8 allergic disease outcomes, 24 autoimmune disease outcomes, 45 cardiovascular disease (CVD) outcomes, 30 musculoskeletal disease outcomes, 9 neurological disease outcomes, 19 psychiatric disease outcomes, 61 cancer incidence outcomes, 4 cancer survival outcomes, 9 metabolic disease outcomes, 15 infectious disease outcomes, 8 digestive disease outcomes, 4 respiratory disease outcomes, 6 genitourinary disease outcomes, 5 ophthalmic disease outcomes, 7 dental disease outcomes, 2 dermatologic disease outcomes, and 3 geriatric disease outcomes. The characteristics of each included study are shown in Table S3.

### **All-cause and cause-specific mortality**

Ten publications(20, 30, 32, 37, 46, 56, 72, 80, 110, 136) reported MR estimates for



total 25(OH)D and all-cause mortality, with 1 inverse finding, 1 positive finding, and 8 null findings (Table S4). After excluding overlapping outcome populations, a meta-analysis of data from 51,013 deaths in 572,720 total participants showed a 25 nmol/L higher genetically predisposed 25(OH)D concentration was not associated with the risk of all-cause mortality (combined OR=0.98, 95% CI: 0.96-1.00;  $P=0.059$ ;  $I^2=0\%$ ). However, in another smaller non-overlapping population (1,338 deaths and 7,079 controls)(46), that participants with higher 25(OH)D-increasing allele score had an increased risk of all-cause mortality (OR=1.08, 95% CI: 1.01-1.14) (Fig. 1, Table S5). Although one publication(37) found an inverse association of genetically predicted total 25(OH)D concentrations with cancer mortality and non-cardiovascular non-cancer mortality (Table S4), meta-analysis results were null (Fig. 1, Table S5). Null associations were also observed for cardiovascular mortality and other cause-specific mortality based on linear assumptions (Fig. 1, Table S4, Table S5). Nevertheless, a nonlinear MR analysis(136) using a stratification of residual 25(OH)D concentrations at 5 nmol/L interval suggested a threshold association of 25(OH)D with the risk of all-cause mortality (~40 nmol/L), cancer mortality (~35 nmol/L), cardiovascular mortality (~25 nmol/L), and non-cardiovascular non-cancer mortality (~40 nmol/L), in which an inverse association was only pronounced at lower levels of 25(OH)D (Table S6).

### **Allergic and autoimmune diseases**

All nine publications(39, 45, 88, 93, 94, 96, 98, 107, 108) reported an inverse association between total 25(OH)D and multiple sclerosis (MS) risk (Table S7), with an 18% lower risk per standard deviation (SD) increase in genetically determined log(25(OH)D) (OR=0.82, 95% CI: 0.69-0.99;  $P=0.035$ ) or a 15% lower risk per 25(OH)D-increasing allele score (OR=0.85, 95% CI: 0.76-0.94;  $P=0.003$ ) using non-overlapping outcome data (Fig. 2, Table S8). Additionally, genetically high 25(OH)D concentrations were associated with reduced risk of pediatric-onset MS ( $P=0.020$ )(48), MS relapse ( $P=0.025$ )(108), non-infectious uveitis and scleritis ( $P=0.049$ )(156), and psoriasis ( $P=0.020$ )(157), while increased risk of Behçet's disease ( $P=0.001$ )(114) and Graves' disease ( $P<0.001$ )(158) (Fig. 2, Table S8). No associations were found between total 25(OH)D concentrations and the risk of other allergic and autoimmune diseases or between serum 25(OH)D<sub>3</sub> concentrations and vitiligo risk (Fig. 2, Table S7, Table S8).

### **Cardiovascular diseases**

One publication(35) showed that a 10% increase in genetically determined total 25(OH)D concentration was related to an 8% lower risk of hypertension (OR=0.92, 95% CI: 0.87-0.97;  $P=0.002$ ), while the other four publications(17, 20, 87, 94) found null associations (Fig. 3, Table S9, Table S10). Genetically high 25(OH)D concentrations were associated with a reduced risk of heart failure (HF) (1/2 publications)(94, 150), overall intracerebral hemorrhage (1/2 publications)(80, 153), nonlobar intracerebral hemorrhage (1 publication)(153), recurrent or de novo ischemic stroke/myocardial infarction (MI) (1 publication)(131), recurrent stroke/MI

(1 publication)(131), recurrent MI (1 publication)(131), and combined cardiovascular endpoints and MI in hypertensive-diabetic subjects (1 publication)(142) (Table S9). After removing overlapping samples, genetically predisposed total 25(OH)D concentrations were not associated with the risk of other CVD endpoints, including overall CVDs, coronary artery disease (CAD), coronary heart disease (CHD), MI, overall stroke, hemorrhagic stroke, and ischemic stroke (Fig. 3, Table S10). Nonlinear MR analyses from the Emerging Risk Factors Collaboration/EPIC-CVD/Vitamin D Studies Collaboration(136) also did not observe any association of 25(OH)D concentrations with the risk of CHD, overall stroke, ischemic stroke, and hemorrhagic stroke. However, another nonlinear MR study using data from UKB(139) indicated an L-shaped association between residual 25(OH)D concentrations and overall CVD risk, leveling off at ~50 nmol/L (Table S11).

### **Musculoskeletal diseases**

Three publications(66, 94, 113) examined the association between total 25(OH)D concentrations and any fracture risk, of which one(113) showed a positive association ( $P=0.040$ ), and the others found null associations (Fig. 4, Table S12, Table S13). One publication(113) showed the risk of fracture of radius/ulna increased with the number of 25(OH)D-increasing alleles ( $P=0.020$ ). In contrast, genetically high 25(OH)D concentrations were inversely associated with lower risks of femur fracture ( $P=0.013$ )(94) and leg fracture ( $P<0.001$ )(94). Total 25(OH)D concentrations were not linked to the risk of fractures at other skeletal sites (including the hip), osteoporosis, osteoarthritis, sarcopenia, and sciatica (Fig. 4, Table S12, Table S13).

### **Neuropsychological disorders**

Nine publications(17, 47, 55, 67, 94, 96, 109, 112, 151) reported MR estimates for total 25(OH)D concentrations and Alzheimer's disease risk, and four articles using GWAS data from the International Genomics of Alzheimer's Project (IGAP)(47, 55, 67, 151) all showed an inverse association; however, the association attenuated and became nonsignificant when merging with UKB GWAS data (Fig. 5, Table S14, Table S15). Higher genetically predisposed total 25(OH)D concentrations were associated with a lower risk of amyotrophic lateral sclerosis (ALS) (1/4 publications)(94, 96, 111, 145), anorexia nervosa (2/2 publications)(94, 96), delirium (2/2 publications)(74, 116), and depression (1/3 publications)(20, 94, 95) (Table S14). After excluding overlapping outcome data, the inverse association remained significant for ALS ( $P=0.025$ ), anorexia nervosa ( $P=0.015$ ), and delirium ( $P<0.001$ ) (Fig. 5, Table S15). No significant associations were found between total 25(OH)D and other neuropsychological disorders based on linear MR analyses. However, a nonlinear MR analysis from UKB(147) suggested a threshold shape for all-causal dementia with evidence of an inverse association at 25(OH)D concentrations below ~50 nmol/L and null association above 50 nmol/L (Table S16).

### **Cancer incidence and survival**

Higher genetically predisposed total 25(OH)D concentrations were associated with a decreased risk of overall ovarian cancer (3/7 publications)(44, 53, 69, 79, 94, 97, 158), high-grade serous ovarian cancer (1/3 publications)(44, 79, 97), and overall esophageal cancer (1/2 publications)(97, 158), but increased risk of basal cell carcinoma (BCC) (1/1 publication)(97) (Table S17). There were no associations between total 25(OH)D concentrations and the risk of any cancer (5 publications)(30, 56, 69, 94, 133) or site-specific cancers, including breast cancer (11 publications)(30, 52, 53, 56, 69, 71, 92, 94, 96, 97, 158), lung cancer (9 publications)(30, 53, 56, 61, 69, 94, 96, 97, 158), colorectal cancer (11 publications)(30, 31, 53, 56, 65, 69, 85, 92, 94, 129, 158), pancreatic cancer (5 publications)(53, 69, 89, 94, 97, 158), and prostate cancer (11 publications)(30, 53, 69, 71, 86, 92, 94, 96, 97, 148, 158), as well as breast cancer survival (1 publication)(96) and hepatocellular carcinoma survival (1 publication)(119) (Table S17). However, the MR estimates based on non-overlapping participants showed an inverse association between genetically predisposed 25(OH)D and the risk of overall ovarian cancer ( $P=0.02$ ) and overall esophageal cancer ( $P=0.041$ ), but a positive association with BCC risk ( $P=0.01$ ) (Fig. 6, Table S18).

### **Other diseases**

Seventeen publications(17, 18, 20, 29, 30, 34, 36, 60, 76, 82, 94, 96, 118, 121, 126, 127, 158) investigated the association between total 25(OH)D concentrations and the risk of type 2 diabetes (T2D), and three(82, 121, 127) suggested an inverse association (Table S19). After excluding overlapping outcome samples, a meta-analysis of data from 130,332 cases in total 1,448,251 participants showed a 5% lower risk of T2D with a SD increase in genetically predicted log(25(OH)D) (combined OR=0.95, 95% CI:0.90-0.99;  $P=0.027$ ,  $I^2=0\%$ ). Nevertheless, no significant associations were found on other exposure scales (>114,535 patients in total 1,247,424 participants) (Fig. 7, Table S20). Similarly, one publication(18) showed a null association of genetically determined serum 25(OH)D<sub>3</sub> concentrations and higher C3-epi-25(OH)D<sub>3</sub> concentrations with T2D risk (Table S19). There was evidence that genetically predisposed total 25(OH)D concentrations were inversely associated with the risk of dyslipidemia (1/1 publication)(17), nonalcoholic fatty liver disease (NAFLD) (1/2 publications)(57, 143), bacterial pneumonia (1/1 publication)(117), and other cataracts (1/1 publication)(158), but were positively associated with the risk of gout (1/2 publications)(94, 96), kidney stone disease (KSD) (1/1 publication)(135), COVID-19 hospitalization (B2) (1/2 publications)(101, 104), and cataract (1/2 publications)(94, 158) (Table S19). The combined MR estimates for NAFLD were 0.85 (95% CI: 0.73-0.99;  $P=0.035$ ,  $I^2=71.7\%$ ) per SD increase in genetically predicted total 25(OH)D concentrations (Fig. 7, Table S20). No significant associations were reported between total 25(OH)D concentrations and risk of other diseases (Fig. 7, Table S19, Table S20). Vitamin D deficiency and insufficiency were also not linked to COVID-19 susceptibility, hospitalization, and severity (Table S19).

### **Methodological quality assessment**

The assessment of methodological quality of the included studies is presented in Table

S21. Most publications (n=125, 94.0%) conducted formal IV analyses, and 8 (6.0%) publications only reported genetic associations (i.e., reduced IV analyses). 88 (66.2%) publications verified all the three core IV assumptions, with 131 (98.5%) meeting the first assumption, 109 (82.0%) meeting the second assumption, and 110 (82.7%) meeting the third assumption. 116 (87.2%) publications selected exposure and outcome samples from populations with the same ancestry. 129 (97.0%) publications reported the genetic variants used as GIs. 117 (88.0%) publications presented the MR estimates on an interpretable scale. 129 (95.5%) publications performed sensitivity analyses, and 127 (95.5%) produced consistent findings with the main analyses. Almost all publications (n=131, 98.5%) conducted linear MR analyses, but only 3 (2.3%) publications further applied nonlinear MR analytical approaches. Overall, 3 (2.3%), 64 (48.1%), 21 (15.8%), and 45 (33.8%) publications were rated as excellent, good, fair, and poor quality, respectively.

## **DISCUSSION**

### **Main findings**

Over the past decade, the causality between vitamin D and a broad spectrum of major health outcomes has been examined by more than 130 MR publications. The present systematic review and meta-analysis provide a comprehensive overview of the up-to-date evidence from these MR analyses. Taken together, MR analyses support that higher genetically predisposed total 25(OH)D concentrations were associated with reduced risk of MS incidence and relapse, non-infectious uveitis and scleritis, psoriasis, femur fracture, leg fracture, ALS, anorexia nervosa, delirium, HF, ovarian cancer, NAFLD, dyslipidemia, and bacterial pneumonia, but increased risk of Behçet's disease, Graves' disease, KSD, fracture of radius/ulna, BCC, and overall cataracts. Evidence from nonlinear MR studies further suggests a threshold association between genetically predicted 25(OH)D and the risk of CVDs, dementia, and death from any cause, cancer, CVDs, and other causes, with evidence of the benefit of higher 25(OH)D only in vitamin D-deficient individuals, especially below 25 nmol/L. In addition, there is conflicting MR evidence on the causal association of vitamin D with the risk of any fracture, hypertension, T2D, gout, intracerebral hemorrhage, and esophageal cancer.

### **Comparison with results from other study designs**

Although vitamin D is essential for regulating bone metabolism, its role in maintaining skeletal health across adulthood is still a matter of controversy. Evidence from MR studies do not support a causal role of vitamin D in total and most site-specific fractures in community-dwelling individuals(20, 66, 94, 113). Other efforts to explore the causality between vitamin D and bone mineral mass also failed to provide supporting evidence for bone health(66, 96, 159-162). Similarly, meta-analyses of randomized controlled trials (RCTs) indicate that vitamin D supplementation alone does not reduce fracture risk in older adults(163-165). The conclusions are supported by several large-scale RCTs, including the Vitamin D Assessment Study (ViDA)(166), the DO-HEALTH study(167), and the Vitamin D and Omega-3 Trial (VITAL)(168). However, in these trials, most participants recruited were vitamin D replete with a fairly low risk of fracture.

Vitamin D regulates the activities of many cells in the innate and adaptive immune system and exerts immunomodulatory, anti-inflammatory, antioxidant, and anti-fibrotic functions(169). Consistent and robust MR evidence exists supporting a protective effect of vitamin D on MS incidence and relapse, regardless of GIs used and data sources(39, 45, 48, 88, 93, 94, 96, 98, 107, 108), in accordance with results from observational studies(170, 171). Additionally, MR studies reported that genetically high 25(OH)D concentrations were linked to decreased risk of non-infectious uveitis and scleritis(156) and psoriasis(157), but increased risk of Behçet's disease(114) and Grave's disease(158). In the VITAL study, daily supplementation of 2,000 IU of vitamin D<sub>3</sub> for five years significantly decreased total autoimmune disease incidence by 22% compared with placebo(172); however, the study was

underpowered for individual endpoints(172). The Copenhagen studies suggest a potential role of vitamin D in preventing bacterial pneumonia(117). This finding is partly supported by the most recent meta-analysis of 46 RCTs including 75,541 participants, in which, vitamin D supplementation decreased the risk of acute respiratory infections by 8% compared with placebo, especially in deficient individuals(173). In contrast, MR analyses indicate that the association between vitamin D and the risk of allergic diseases(17, 43, 49, 51, 96, 115, 158) is unlikely to be causal. Consistently, evidence from RCTs also does not support the use of vitamin D supplements to protect against asthma and atopic dermatitis(174, 175).

Linear MR analyses failed to provide supporting evidence for vitamin D in preventing overall CVD(80, 94, 133, 139), as well as cause-specific CVD, such as CAD(17, 42, 94, 96, 118, 136, 158), MI(30, 38, 80, 96), and stroke(68, 80, 94, 96, 118, 136, 147, 158). These findings are in line with meta-analyses of RCTs(176) and several large-scale RCTs of vitamin D supplementation conducted in the United States(177), New Zealand(178), and Finland(179), designed with CVD as one of the primary outcomes. However, when applying nonlinear MR analytical approaches to data from UKB, an L-shaped association was observed between 25(OH)D concentrations and overall CVD risk, where an inverse association was only observed at concentrations below 50 nmol/L(139). The HERMES consortium reported an inverse association of genetically predisposed 25(OH)D concentrations with HF risk(150), which were not replicated by the FinnGen and Biobank Japan studies(94, 158). The VITAL Heart Failure study also reported no beneficial effect of vitamin D supplementation on reducing the first or recurrent hospitalization rates for HF(180). Linear MR results regarding vitamin D and hypertension risk remain contradictory(17, 20, 35, 36, 87). Given that a recent nonlinear MR analysis suggests a potential effect of higher 25(OH)D on lowering systolic and diastolic blood pressure up to a threshold of 50 nmol/L(139), further RCTs should target vitamin D-deficient participants.

Albeit many observational studies have linked vitamin D deficiency with increased risk of total and site-specific cancer(9, 181), evidence from MR analyses does not support a causal role of vitamin D in preventing most cancers. In accordance with the findings from MR studies, recently published large-scale RCTs, i.e., VITAL(177, 182), ViDA(183), and Finnish Vitamin D Trial (FIND)(179), failed to provide any supporting evidence for vitamin D in the primary prevention of total and site-specific cancers (breast, colorectal, prostate). Combining the existing RCTs also generated null results for the risk of total cancer(184, 185) and colorectal cancers and polyps(186), irrespective of baseline serum 25(OH)D concentrations. Nevertheless, MR studies, although not all, suggest a causal association of genetically high 25(OH)D with lower risk of epithelial ovarian cancer(44, 94, 97) and esophageal cancer(158), but higher risk of BCC(97). However, the positive association between genetically predicted 25(OH)D and BCC risk is likely attributed to pleiotropy, because the association was attenuated and became nonsignificant after adjustment for pigmentation and sun exposure(97). Consistently, RCTs also did not observe

deleterious effects of vitamin D supplementation on keratinocyte cancer(187, 188).

Our meta-analyses of MR studies demonstrated no association between vitamin D and all-cause and cause-specific mortality based on linear assumptions. However, recent nonlinear MR analyses uncovered an L-shaped association of genetically determined 25(OH)D concentrations with the risk of death from any cause, cancer, CVD, and non-cancer, non-cardiovascular causes, where the inverse association was only pronounced in vitamin D-deficient individuals (especially <25 nmol/L)(136, 189). In contrast, vitamin D supplementation was not related to any death outcomes in several large-scale RCTs, including VITAL(177), ViDA(178, 183), FIND(179), and D-Health Trial(190). The discrepancy may partly be owing to the relatively short follow-up and recruitment of few participants with vitamin D deficiency in the RCTs. Meta-analyses of RCTs concluded that vitamin D supplementation reduced cancer mortality compared with no supplementation(184, 185, 191). Considering that vitamin D supplementation has little influence on cancer incidence(184, 185), the benefit on cancer mortality may reflect improved survival after cancer diagnosis by optimizing vitamin D status. Indeed, observational studies and RCTs have linked vitamin D supplementation with superior survival in cancer patients(192, 193).

Accumulating evidence suggests that vitamin D has potential neuroprotective properties through regulating neuronal differentiation, neurotrophin expression, neuromodulator synthesis, intracellular calcium signaling, stress responsivity, inflammation, and oxidative stress(194). Many observational studies have associated vitamin D deficiency with a broad range of neurological and psychiatric conditions(74, 116, 195-200), but only some links may be causal, e.g., delirium, ALS, and anorexia nervosa, as supposed by linear MR analyses. In addition, genetically predicted 25(OH)D concentrations, instrumented by the SNPs selected from the SUNLIGHT consortium(14, 15), were inversely associated with the risk of Alzheimer's disease in the IGAP consortium(47, 55, 67, 112, 151). However, the finding was not corroborated in other populations(17, 109, 112) or by using SNPs selected from UKB GWAS data(94, 96). A nonlinear MR study using data from UKB supports a beneficial effect of higher 25(OH)D on all-cause dementia in vitamin D-deficient individuals up to a threshold of ~50 nmol/L(147). Discordantly, post-hoc analyses of two RCTs demonstrated no cognitive benefit of 2000 IU/day vitamin D supplementation for 2-3 years in healthy older adults over 60 years(201, 202). Of note, in both trials, the proportion of participants with vitamin D deficiency was relatively low.

Since 2014, seventeen MR studies have been published for T2D risk, but most studies generated disappointing findings(17, 18, 20, 29, 30, 34, 36, 60, 76, 82, 94, 96, 118, 121, 126, 127, 158). Consistent with the findings from MR studies, three large RCTs reported no benefit of supplementation with vitamin D<sub>3</sub> or active vitamin D on preventing the progression of prediabetes into T2D(203-205). However, combining these three trials with 5 other smaller trials showed that vitamin D supplementation

resulted in a reduction in T2D incidence and an increase in the rate of regression to normoglycemia, especially in nonobese participants with prediabetes(206). In our review, evidence from MR studies also suggests a beneficial effect of vitamin D on preventing NAFLD and dyslipidemia. These findings are supported by several, although not all, MR studies investigating the causal role of vitamin D on serum lipids, in which genetically high 25(OH)D concentrations were associated with higher HDL cholesterol levels, and lower triglycerides and total cholesterol levels(33, 80, 207). However, a meta-analysis of 41 RCTs, including 3,434 participants, concluded that vitamin D supplementation reduced total cholesterol, LDL cholesterol, and triglyceride concentrations but did not affect HDL cholesterol(208). Additionally, MR studies reported positive associations between genetically predicted 25(OH)D concentrations and the risk of gout(96) and overall cataract(158), while these findings were not confirmed by using different GIs(94) or in different populations(94, 158). The D-Health Trial showed no effect of monthly 60,000 IU of vitamin D<sub>3</sub> supplementation for 5 years on the incidence of cataract surgery(209).

A newly published MR study using data from UKB, in which genetically high 25(OH)D concentrations were linked to increased risk of KSD, probably through elevating serum calcium levels, has raised concern about the safety of vitamin D supplement use(135). However, most intervention studies did not show that long-term, even large doses, vitamin D supplementation, which elevated serum 25(OH)D concentrations, increased KSD risk (210, 211). Similar conclusions were drawn in recent large-scale, long-term RCTs of vitamin D<sub>3</sub> supplementation, such as VITAL(177), ViDA(212), FIND(179), D-Health Trial(190), and Vitamin D and Type 2 Diabetes (D2d) trial(203). A nested case-control study in the Health Professional Follow-up Study suggests that higher concentrations of plasma 1,25(OH)<sub>2</sub>D, rather than 25(OH)D, increase KSD risk, even in normal ranges(213). Indeed, 1,25(OH)<sub>2</sub>D is the active form of vitamin D responsible for stimulating intestinal calcium absorption. The renal activation of 1,25(OH)<sub>2</sub>D is tightly regulated and is only slightly affected by circulating 25(OH)D concentrations(214). Some genetic variants that affect 25(OH)D concentration may also affect 1,25(OH)<sub>2</sub>D levels(2); thus, it might be problematic to use SNPs related to serum 25(OH)D concentrations as instruments(135). In contrast, MR estimates from Biobank Japan suggest no association between genetic predisposed 25(OH)D concentrations and urolithiasis risk(158). However, given that both animal studies and human data observed increased incidence of hypercalcemia and/or hypercalciuria with high doses of vitamin D treatment(210, 211, 215, 216), the causal role of vitamin D in KSD cannot be excluded entirely, especially when exposure to both vitamin D and calcium supplementation(217).

### **Possible reasons for the discordance between different study designs**

MR studies and RCTs draw concordant conclusions in most cases, but there are some exceptions. MR studies depend on valid IV assumptions. However, there are substantial differences in the methodological quality of the included MR studies. It is



hard to know whether the MR estimates from some studies are valid due to inadequate reporting of the methods and results. MR studies are also limited by the low variance of circulating 25(OH)D concentrations explained by most GIs (usually <5%), which may result in insufficient statistical power. Also, the associations varied by instruments, study populations, and analytical approaches. Additionally, most MR studies only applied standard MR analytical methods based on linear assumptions, which might mask the true cause and effect, as suggested by observational studies and recent nonlinear MR analyses. However, MR analyses have advantages over RCTs in predicting lifelong 25(OH)D concentrations. The duration of RCTs is usually no longer than 5 years, and such short-term scenarios may not be enough to evaluate the effectiveness and safety of vitamin D supplementation in the context of chronic diseases. Moreover, even large-scale RCTs, like VITAL with sufficient power to detect the effect of vitamin D supplementation on overall CVD and cancer, might be underpowered to examine the impact on individual outcomes. In addition, evidence from observational studies and nonlinear MR analyses suggests that the health effects of vitamin D might only be pronounced among vitamin D-deficient individuals. However, most RCTs have been undertaken in populations with good vitamin D status.

### **Strengths and limitations**

In this systematic review and meta-analysis, we comprehensively summarized the evidence on vitamin D and a variety of major health outcomes from MR approaches. Furthermore, we performed meta-analyses, when appropriate, to synthesize the results from different study populations. In addition, unlike previous reviews, we systematically evaluated the methodological quality of the available MR studies. Nevertheless, several limitations are needed to be acknowledged in the review. First, the magnitude of the MR estimates cannot be comparable across outcomes because of diverse GIs and units of estimated effect used in the included MR studies, such as per allele change, per SD change in 25(OH)D, per unit change in  $\log(25(OH)D)$ . Second, meta-analysis of studies was technically impossible for some endpoints on account of the large methodological heterogeneity. Third, the included MR studies are predominantly conducted among populations of European ancestry. As a result, caution should be taken when generalizing the findings to ethnically diverse populations. Fourth, quality assessment tool always involves some subjectivity, but we developed the tool according to well-accepted MR guidelines and tried to capture the critical elements of the MR design.

### **Conclusions**

Although current evidence from MR studies does not support a causal role of vitamin D in most health outcomes, vitamin D is promising to protect against MS, non-infectious uveitis and scleritis, psoriasis, anorexia nervosa, delirium, ovarian cancer, bacterial pneumonia, CVDs, dementia, and death from any cause, CVDs, and cancer, especially in vitamin D-deficient individuals. Meanwhile, vitamin D potentially increases the risk of Behçet's disease, Graves' disease, and KSD. The heterogeneity in

methodological quality and contradictory findings across studies preclude drawing firm conclusions. High-quality MR studies with the ability to explore nonlinearity are needed to re-evaluate these associations, particularly in non-European populations. Additionally, well-designed, long-term, large-scale RCTs are warranted to confirm the results.

## Statements and Declarations

### ***Funding***

This work was supported by the National Natural Science Foundation of China (81803219), the Natural Science Foundation of Guangdong Province, China (2018A030310335). The sponsors had no role in the study design, data analysis or interpretation of results.

### ***Competing Interests***

The authors have no relevant financial or non-financial interests to disclose.

### ***Authors' contributions***

Edward L. Giovannucci and Aiping Fang conceptualized the review; Aiping Fang designed the search strategy and performed the literature search; Aiping Fang and Yue Zhao screened abstracts and full-texts; Aiping Fang and Yue Zhao extracted the data; Aiping Fang, Yue Zhao and Ping Yang checked the data; Yue Zhao, Ping Yang and Aiping Fang assessed the methodological quality of the included studies; Aiping Fang and Yue Zhao analyzed the data; Aiping Fang wrote the original draft of the manuscript; Edward L. Giovannucci and Xuehong Zhang edited and critically reviewed the original draft of the manuscript; Edward L. Giovannucci had primary responsibility for the final content; and all authors read and approved the final manuscript.

### ***Ethics approval***

Not available.

### ***Consent to participate***

Not available.

### ***Consent to publish***

Not available.

### ***Data transparency***

Data collection forms, data extracted from included studies, and data used for all analyses are available upon request to the corresponding author.

## REFERENCE

1. Holick MF. Vitamin D and bone health. *J Nutr.* 1996;126(4 Suppl):1159s-64s. doi:10.1093/jn/126.suppl\_4.1159S
2. Feldman D, Krishnan AV, Swami S, Giovannucci E, Feldman BJ. The role of vitamin D in reducing cancer risk and progression. *Nat. Rev. Cancer.* 2014;14(5):342-57. doi:10.1038/nrc3691
3. Dimitrov V, Salehi-Tabar R, An BS, White JH. Non-classical mechanisms of transcriptional regulation by the vitamin D receptor: insights into calcium homeostasis, immune system regulation and cancer chemoprevention. *J Steroid Biochem Mol Biol.* 2014;144 Pt A:74-80. doi:10.1016/j.jsbmb.2013.07.012
4. Bikle D. Nonclassic actions of vitamin D. *J Clin Endocrinol Metab.* 2009;94(1):26-34. doi:10.1210/jc.2008-1454
5. Wang Y, Zhu J, DeLuca HF. Where is the vitamin D receptor? *Arch Biochem Biophys.* 2012;523(1):123-33. doi:10.1016/j.abb.2012.04.001
6. Hewison M, Burke F, Evans KN, et al. Extra-renal 25-hydroxyvitamin D3-1alpha-hydroxylase in human health and disease. *J Steroid Biochem Mol Biol.* 2007;103(3-5):316-21. doi:10.1016/j.jsbmb.2006.12.078
7. Kahwati LC, LeBlanc E, Weber RP, et al. Screening for Vitamin D Deficiency in Adults: Updated Evidence Report and Systematic Review for the US Preventive Services Task Force. *JAMA.* 2021;325(14):1443-63. doi:10.1001/jama.2020.26498
8. Bouillon R, Marcocci C, Carmeliet G, et al. Skeletal and Extraskelatal Actions of Vitamin D: Current Evidence and Outstanding Questions. *Endocr. Rev.* 2019;40(4):1109-51. doi:10.1210/er.2018-00126
9. Liu D, Meng X, Tian Q, et al. Vitamin D and Multiple Health Outcomes: An Umbrella Review of Observational Studies, Randomized Controlled Trials, and Mendelian Randomization Studies. *Adv Nutr.* 2022;13(4):1044-62. doi:10.1093/advances/nmab142
10. Bouillon R, Manousaki D, Rosen C, Trajanoska K, Rivadeneira F, Richards JB. The health effects of vitamin D supplementation: evidence from human studies. *Nat Rev Endocrinol.* 2022;18(2):96-110. doi:10.1038/s41574-021-00593-z
11. Munns CF, Shaw N, Kiely M, et al. Global Consensus Recommendations on Prevention and Management of Nutritional Rickets. *J. Clin. Endocrinol. Metab.* 2016;101(2):394-415. doi:10.1210/jc.2015-2175
12. Sanderson E, Glymour MM, Holmes MV, et al. Mendelian randomization. *Nature Reviews Methods Primers.* 2022;2(1):6. doi:10.1038/s43586-021-00092-5
13. Wade KH, Yarmolinsky J, Giovannucci E, et al. Applying Mendelian randomization to appraise causality in relationships between nutrition and cancer. *Cancer Causes Control.* 2022;33(5):631-52. doi:10.1007/s10552-022-01562-1
14. Wang TJ, Zhang F, Richards JB, et al. Common genetic determinants of vitamin D insufficiency: a genome-wide association study. *Lancet.* 2010;376(9736):180-8. doi:10.1016/s0140-6736(10)60588-0
15. Jiang X, O'Reilly PF, Aschard H, et al. Genome-wide association study in 79,366 European-ancestry individuals informs the genetic architecture of 25-hydroxyvitamin D levels. *Nature communications.* 2018;9(1):260. doi:10.1038/s41467-017-02662-2
16. Manousaki D, Mitchell R, Dudding T, et al. Genome-wide Association Study for Vitamin D Levels Reveals 69 Independent Loci. *Am J Hum Genet.* 2020;106(3):327-37. doi:10.1016/j.ajhg.2020.01.017

17. Revez JA, Lin T, Qiao Z, et al. Genome-wide association study identifies 143 loci associated with 25 hydroxyvitamin D concentration. *Nat Commun.* 2020;11(1):1647. doi:10.1038/s41467-020-15421-7
18. Zheng JS, Luan J, Sofianopoulou E, et al. The association between circulating 25-hydroxyvitamin D metabolites and type 2 diabetes in European populations: A meta-analysis and Mendelian randomisation analysis. *PLoS Med.* 2020;17(10):e1003394. doi:10.1371/journal.pmed.1003394
19. Manousaki D, Dudding T, Haworth S, et al. Low-Frequency Synonymous Coding Variation in CYP2R1 Has Large Effects on Vitamin D Levels and Risk of Multiple Sclerosis. *Am J Hum Genet.* 2017;101(2):227-38. doi:10.1016/j.ajhg.2017.06.014
20. Meng X, Li X, Timofeeva MN, et al. Phenome-wide Mendelian-randomization study of genetically determined vitamin D on multiple health outcomes using the UK Biobank study. *Int J Epidemiol.* 2019;48(5):1425-34. doi:10.1093/ije/dyz182
21. Jiang X, Kiel DP, Kraft P. The genetics of vitamin D. *Bone.* 2019;126:59-77. doi:10.1016/j.bone.2018.10.006
22. Page MJ, McKenzie JE, Bossuyt PM, et al. The PRISMA 2020 statement: an updated guideline for reporting systematic reviews. *Bmj.* 2021;372:n71. doi:10.1136/bmj.n71
23. Skrivankova VW, Richmond RC, Woolf BAR, et al. Strengthening the Reporting of Observational Studies in Epidemiology Using Mendelian Randomization: The STROBE-MR Statement. *JAMA.* 2021;326(16):1614-21. doi:10.1001/jama.2021.18236
24. Fang A, Zhao Y, Yang P, Zhang X, Giovannucci E. Health Effects of Vitamin D: Evidence from Mendelian Randomization studies. *protocols.io*, protocols.io. 2022. <https://dx.doi.org/10.17504/protocols.io.eq2ly7nzmlx9/v1>. Accessed October 17, 2022.
25. Boef AG, Dekkers OM, le Cessie S. Mendelian randomization studies: a review of the approaches used and the quality of reporting. *Int. J. Epidemiol.* 2015;44(2):496-511. doi:10.1093/ije/dyv071
26. Spiga F, Gibson M, Dawson S, et al. Tools for assessing quality and risk of bias in Mendelian randomization studies: a systematic review. *Int J Epidemiol.* 2022. doi:10.1093/ije/dyac149
27. Davies NM, Holmes MV, Davey Smith G. Reading Mendelian randomisation studies: a guide, glossary, and checklist for clinicians. *Bmj.* 2018;362:k601. doi:10.1136/bmj.k601
28. Burgess S, Davey Smith G, Davies NM, et al. Guidelines for performing Mendelian randomization investigations. *Wellcome Open Res.* 2019;4:186. doi:10.12688/wellcomeopenres.15555.2
29. Afzal S, Brondum-Jacobsen P, Bojesen SE, Nordestgaard BG. Vitamin D concentration, obesity, and risk of diabetes: a mendelian randomisation study. *Lancet Diabetes Endocrinol.* 2014;2(4):298-306. doi:10.1016/S2213-8587(13)70200-6
30. Jorde R, Schirmer H, Wilsgaard T, et al. Polymorphisms related to the serum 25-hydroxyvitamin D level and risk of myocardial infarction, diabetes, cancer and mortality. The Tromsø Study. *PLoS One.* 2012;7(5):e37295. doi:10.1371/journal.pone.0037295
31. Theodoratou E, Palmer T, Zgaga L, et al. Instrumental variable estimation of the causal effect of plasma 25-hydroxy-vitamin D on colorectal cancer risk: a mendelian randomization analysis. *PLoS One.* 2012;7(6):e37662. doi:10.1371/journal.pone.0037662
32. Trummer O, Pilz S, Hoffmann MM, et al. Vitamin D and mortality: a Mendelian randomization study. *Clin Chem.* 2013;59(5):793-7. doi:10.1373/clinchem.2012.193185
33. Skaaby T, Husemoen LL, Martinussen T, et al. Vitamin D status, filaggrin genotype, and cardiovascular risk factors: a Mendelian randomization approach. *PLoS One.* 2013;8(2):e57647. doi:10.1371/journal.pone.0057647

34. Buijsse B, Boeing H, Hirche F, et al. Plasma 25-hydroxyvitamin D and its genetic determinants in relation to incident type 2 diabetes: a prospective case-cohort study. *Eur J Epidemiol.* 2013;28(9):743-52. doi:10.1007/s10654-013-9844-5
35. Vimalaswaran KS, Cavadino A, Berry DJ, et al. Association of vitamin D status with arterial blood pressure and hypertension risk: a mendelian randomisation study. *Lancet Diabetes Endocrinol.* 2014;2(9):719-29. doi:10.1016/S2213-8587(14)70113-5
36. Ye Z, Sharp SJ, Burgess S, et al. Association between circulating 25-hydroxyvitamin D and incident type 2 diabetes: a mendelian randomisation study. *The lancet. Diabetes & endocrinology.* 2015;3(1):35-42. doi:10.1016/S2213-8587(14)70184-6
37. Afzal S, Brondum-Jacobsen P, Bojesen SE, Nordestgaard BG. Genetically low vitamin D concentrations and increased mortality: Mendelian randomisation analysis in three large cohorts. *BMJ.* 2014;349:g6330. doi:10.1136/bmj.g6330
38. Brondum-Jacobsen P, Benn M, Afzal S, Nordestgaard BG. No evidence that genetically reduced 25-hydroxyvitamin D is associated with increased risk of ischaemic heart disease or myocardial infarction: a Mendelian randomization study. *Int J Epidemiol.* 2015;44(2):651-61. doi:10.1093/ije/dyv078
39. Mokry LE, Ross S, Ahmad OS, et al. Vitamin D and Risk of Multiple Sclerosis: A Mendelian Randomization Study. *PLoS Med.* 2015;12(8):e1001866. doi:10.1371/journal.pmed.1001866
40. Dudding T, Thomas SJ, Duncan K, Lawlor DA, Timpson NJ. Re-Examining the Association between Vitamin D and Childhood Caries. *PLoS One.* 2015;10(12):e0143769. doi:10.1371/journal.pone.0143769
41. Taylor AE, Burgess S, Ware JJ, et al. Investigating causality in the association between 25(OH)D and schizophrenia. *Sci Rep.* 2016;6:26496. doi:10.1038/srep26496
42. Manousaki D, Mokry LE, Ross S, Goltzman D, Richards JB. Mendelian Randomization Studies Do Not Support a Role for Vitamin D in Coronary Artery Disease. *Circ Cardiovasc Genet.* 2016;9(4):349-56. doi:10.1161/CIRCGENETICS.116.001396
43. Hysinger EB, Roizen JD, Mentch FD, et al. Mendelian randomization analysis demonstrates that low vitamin D is unlikely causative for pediatric asthma. *J. Allergy Clin. Immunol.* 2016;138(6):1747-9 e4. doi:10.1016/j.jaci.2016.06.056
44. Ong JS, Cuellar-Partida G, Lu Y, et al. Association of vitamin D levels and risk of ovarian cancer: a Mendelian randomization study. *Int J Epidemiol.* 2016;45(5):1619-30. doi:10.1093/ije/dyw207
45. Rhead B, Baarnhielm M, Gianfrancesco M, et al. Mendelian randomization shows a causal effect of low vitamin D on multiple sclerosis risk. *Neurol Genet.* 2016;2(5):e97. doi:10.1212/NXG.000000000000097
46. Ordóñez-Mena JM, Maalmi H, Schöttker B, et al. Genetic Variants in the Vitamin D Pathway, 25(OH)D Levels, and Mortality in a Large Population-Based Cohort Study. *J Clin Endocrinol Metab.* 2017;102(2):470-7. doi:10.1210/jc.2016-2468
47. Mokry LE, Ross S, Morris JA, Manousaki D, Forgetta V, Richards JB. Genetically decreased vitamin D and risk of Alzheimer disease. *Neurology.* 2016;87(24):2567-74. doi:10.1212/WNL.0000000000003430
48. Gianfrancesco MA, Stridh P, Rhead B, et al. Evidence for a causal relationship between low vitamin D, high BMI, and pediatric-onset MS. *Neurology.* 2017;88(17):1623-9. doi:10.1212/WNL.0000000000003849
49. Manousaki D, Paternoster L, Standl M, et al. Vitamin D levels and susceptibility to asthma,

- elevated immunoglobulin E levels, and atopic dermatitis: A Mendelian randomization study. *PLoS Med.* 2017;14(5):e1002294. doi:10.1371/journal.pmed.1002294
50. Larsson SC, Singleton AB, Nalls MA, Richards JB, International Parkinson's Disease Genomics C. No clear support for a role for vitamin D in Parkinson's disease: A Mendelian randomization study. *Mov. Disord.* 2017;32(8):1249-52. doi:10.1002/mds.27069
  51. Mao Y, Zhan Y, Huang Y. Vitamin D and asthma: A Mendelian randomization study. *Ann. Allergy. Asthma. Immunol.* 2017;119(1):95-7 e1. doi:10.1016/j.anai.2017.05.018
  52. Wang S, Huo D, Kupfer S, et al. Genetic variation in the vitamin D related pathway and breast cancer risk in women of African ancestry in the root consortium. *Int. J. Cancer.* 2018;142(1):36-43. doi:10.1002/ijc.31038
  53. Dimitrakopoulou VI, Tsilidis KK, Haycock PC, et al. Circulating vitamin D concentration and risk of seven cancers: Mendelian randomisation study. *BMJ.* 2017;359:j4761. doi:10.1136/bmj.j4761
  54. Winslow UC, Nordestgaard BG, Afzal S. High plasma 25-hydroxyvitamin D and high risk of nonmelanoma skin cancer: a Mendelian randomization study of 97 849 individuals. *Br J Dermatol.* 2018;178(6):1388-95. doi:10.1111/bjd.16127
  55. Larsson SC, Traylor M, Malik R, et al. Modifiable pathways in Alzheimer's disease: Mendelian randomisation analysis. *BMJ.* 2017;359:j5375. doi:10.1136/bmj.j5375
  56. Chandler PD, Tobias DK, Wang L, et al. Association between Vitamin D Genetic Risk Score and Cancer Risk in a Large Cohort of U.S. Women. *Nutrients.* 2018;10(1). doi:10.3390/nu10010055
  57. Wang N, Chen C, Zhao L, et al. Vitamin D and Nonalcoholic Fatty Liver Disease: Bi-directional Mendelian Randomization Analysis. *EBioMedicine.* 2018;28:187-93. doi:10.1016/j.ebiom.2017.12.027
  58. Takahashi H, Cornish AJ, Sud A, et al. Mendelian randomisation study of the relationship between vitamin D and risk of glioma. *Sci Rep.* 2018;8(1):2339. doi:10.1038/s41598-018-20844-w
  59. Dudding T, Johansson M, Thomas SJ, Brennan P, Martin RM, Timpson NJ. Assessing the causal association between 25-hydroxyvitamin D and the risk of oral and oropharyngeal cancer using Mendelian randomization. *Int. J. Cancer.* 2018;143(5):1029-36. doi:10.1002/ijc.31377
  60. Lu L, Bennett DA, Millwood IY, et al. Association of vitamin D with risk of type 2 diabetes: A Mendelian randomisation study in European and Chinese adults. *PLoS Med.* 2018;15(5):e1002566. doi:10.1371/journal.pmed.1002566
  61. Sun YQ, Brumpton BM, Bonilla C, et al. Serum 25-hydroxyvitamin D levels and risk of lung cancer and histologic types: a Mendelian randomisation analysis of the HUNT study. *Eur Respir J.* 2018;51(6). doi:10.1183/13993003.00329-2018
  62. Bae SC, Lee YH. Vitamin D level and risk of systemic lupus erythematosus and rheumatoid arthritis: a Mendelian randomization. *Clin. Rheumatol.* 2018;37(9):2415-21. doi:10.1007/s10067-018-4152-9
  63. Magnus MC, Miliku K, Bauer A, et al. Vitamin D and risk of pregnancy related hypertensive disorders: mendelian randomisation study. *BMJ.* 2018;361:k2167. doi:10.1136/bmj.k2167
  64. Lund-Nielsen J, Vedel-Krogh S, Kobylecki CJ, Brynskov J, Afzal S, Nordestgaard BG. Vitamin D and Inflammatory Bowel Disease: Mendelian Randomization Analyses in the Copenhagen Studies and UK Biobank. *J. Clin. Endocrinol. Metab.* 2018;103(9):3267-77. doi:10.1210/jc.2018-00250
  65. He Y, Timofeeva M, Farrington SM, et al. Exploring causality in the association between circulating 25-hydroxyvitamin D and colorectal cancer risk: a large Mendelian randomisation study. *BMC Med.* 2018;16(1):142. doi:10.1186/s12916-018-1119-2
  66. Trajanoska K, Morris JA, Oei L, et al. Assessment of the genetic and clinical determinants of

- fracture risk: genome wide association and mendelian randomisation study. *BMJ*. 2018;362:k3225. doi:10.1136/bmj.k3225
67. Larsson SC, Traylor M, Markus HS, Michaelsson K. Serum Parathyroid Hormone, 25-Hydroxyvitamin D, and Risk of Alzheimer's Disease: A Mendelian Randomization Study. *Nutrients*. 2018;10(9). doi:10.3390/nu10091243
68. Larsson SC, Traylor M, Mishra A, et al. Serum 25-Hydroxyvitamin D Concentrations and Ischemic Stroke and Its Subtypes. *Stroke*. 2018;49(10):2508-11. doi:10.1161/STROKEAHA.118.022242
69. Ong JS, Gharahkhani P, An J, et al. Vitamin D and overall cancer risk and cancer mortality: a Mendelian randomization study. *Hum Mol Genet*. 2018;27(24):4315-22. doi:10.1093/hmg/ddy307
70. Michaelsson K, Melhus H, Larsson SC. Serum 25-Hydroxyvitamin D Concentrations and Major Depression: A Mendelian Randomization Study. *Nutrients*. 2018;10(12). doi:10.3390/nu10121987
71. Jiang X, Dimou NL, Al-Dabhani K, et al. Circulating vitamin D concentrations and risk of breast and prostate cancer: a Mendelian randomization study. *Int J Epidemiol*. 2019;48(5):1416-24. doi:10.1093/ije/dyy284
72. Aspelund T, Grubler MR, Smith AV, et al. Effect of Genetically Low 25-Hydroxyvitamin D on Mortality Risk: Mendelian Randomization Analysis in 3 Large European Cohorts. *Nutrients*. 2019;11(1). doi:10.3390/nu11010074
73. Dong J, Gharahkhani P, Chow WH, et al. No Association Between Vitamin D Status and Risk of Barrett's Esophagus or Esophageal Adenocarcinoma: A Mendelian Randomization Study. *Clin Gastroenterol. Hepatol*. 2019;17(11):2227-35 e1. doi:10.1016/j.cgh.2019.01.041
74. Bowman K, Jones L, Pilling LC, et al. Vitamin D levels and risk of delirium: A mendelian randomization study in the UK Biobank. *Neurology*. 2019;92(12):e1387-e94. doi:10.1212/WNL.00000000000007136
75. Havdahl A, Mitchell R, Paternoster L, Davey Smith G. Investigating causality in the association between vitamin D status and self-reported tiredness. *Sci. Rep*. 2019;9(1):2880. doi:10.1038/s41598-019-39359-z
76. Wang N, Wang C, Chen X, et al. Vitamin D, prediabetes and type 2 diabetes: bidirectional Mendelian randomization analysis. *Eur. J. Nutr*. 2020;59(4):1379-88. doi:10.1007/s00394-019-01990-x
77. Libuda L, Laabs BH, Ludwig C, et al. Vitamin D and the Risk of Depression: A Causal Relationship? Findings from a Mendelian Randomization Study. *Nutrients*. 2019;11(5). doi:10.3390/nu11051085
78. Liyanage UE, Law MH, Melanoma Meta-analysis C, Barrett JH, Iles MM, MacGregor S. Is there a causal relationship between vitamin D and melanoma risk? A Mendelian randomization study. *Br. J. Dermatol*. 2020;182(1):97-103. doi:10.1111/bjd.18238
79. Yarmolinsky J, Relton CL, Lophatananon A, et al. Appraising the role of previously reported risk factors in epithelial ovarian cancer risk: A Mendelian randomization analysis. *PLoS Med*. 2019;16(8):e1002893. doi:10.1371/journal.pmed.1002893
80. Huang T, Afzal S, Yu C, et al. Vitamin D and cause-specific vascular disease and mortality: a Mendelian randomisation study involving 99,012 Chinese and 106,911 European adults. *BMC Med*. 2019;17(1):160. doi:10.1186/s12916-019-1401-y
81. Milaneschi Y, Peyrot WJ, Nivard MG, Mbarek H, Boomsma DI, B WJHP. A role for vitamin D and omega-3 fatty acids in major depression? An exploration using genomics. *Transl Psychiatry*. 2019;9(1):219. doi:10.1038/s41398-019-0554-y



82. Yuan S, Jiang X, Michaelsson K, Larsson SC. Genetic Prediction of Serum 25-Hydroxyvitamin D, Calcium, and Parathyroid Hormone Levels in Relation to Development of Type 2 Diabetes: A Mendelian Randomization Study. *Diabetes Care*. 2019;42(12):2197-203. doi:10.2337/dc19-1247
83. Chen C, Chen Y, Weng P, et al. Association of 25-hydroxyvitamin D with cardiometabolic risk factors and metabolic syndrome: a mendelian randomization study. *Nutr. J.* 2019;18(1):61. doi:10.1186/s12937-019-0494-7
84. Saunders CN, Cornish AJ, Kinnersley B, et al. Lack of association between modifiable exposures and glioma risk: a Mendelian randomization analysis. *Neuro Oncol.* 2020;22(2):207-15. doi:10.1093/neuonc/noz209
85. Cornish AJ, Law PJ, Timofeeva M, et al. Modifiable pathways for colorectal cancer: a mendelian randomisation analysis. *Lancet Gastroenterol Hepatol.* 2020;5(1):55-62. doi:10.1016/S2468-1253(19)30294-8
86. Kazmi N, Haycock P, Tsilidis K, et al. Appraising causal relationships of dietary, nutritional and physical-activity exposures with overall and aggressive prostate cancer: two-sample Mendelian-randomization study based on 79 148 prostate-cancer cases and 61 106 controls. *Int. J. Epidemiol.* 2020;49(2):587-96. doi:10.1093/ije/dyz235
87. Kwak SY, Cho Y, Oh H, Shin MJ. Association of circulating 25-hydroxyvitamin D levels with hypertension and blood pressure values in Korean adults: A Mendelian randomization study on a subset of the Korea National Health and Nutrition Survey 2011-2012 population. *Nutr. Res. Pract.* 2019;13(6):498-508. doi:10.4162/nrp.2019.13.6.498
88. Jacobs BM, Noyce AJ, Giovannoni G, Dobson R. BMI and low vitamin D are causal factors for multiple sclerosis: A Mendelian Randomization study. *Neurol Neuroimmunol Neuroinflamm.* 2020;7(2). doi:10.1212/NXI.0000000000000662
89. Lu Y, Gentiluomo M, Lorenzo-Bermejo J, et al. Mendelian randomisation study of the effects of known and putative risk factors on pancreatic cancer. *J. Med. Genet.* 2020;57(12):820-8. doi:10.1136/jmedgenet-2019-106200
90. Went M, Cornish AJ, Law PJ, et al. Search for multiple myeloma risk factors using Mendelian randomization. *Blood Adv.* 2020;4(10):2172-9. doi:10.1182/bloodadvances.2020001502
91. Howell AE, Robinson JW, Wootton RE, et al. Testing for causality between systematically identified risk factors and glioma: a Mendelian randomization study. *BMC Cancer.* 2020;20(1):508. doi:10.1186/s12885-020-06967-2
92. Cheng WW, Wang ZK, Shangguan HF, Zhu Q, Zhang HY. Are vitamins relevant to cancer risks? A Mendelian randomization investigation. *Nutrition.* 2020;78:110870. doi:10.1016/j.nut.2020.110870
93. Yuan S, Xiong Y, Larsson SC. An atlas on risk factors for multiple sclerosis: a Mendelian randomization study. *J. Neurol.* 2021;268(1):114-24. doi:10.1007/s00415-020-10119-8
94. Ye Y, Yang H, Wang Y, Zhao H. A comprehensive genetic and epidemiological association analysis of vitamin D with common diseases/traits in the UK Biobank. *Genet. Epidemiol.* 2021;45(1):24-35. doi:10.1002/gepi.22357
95. Mulugeta A, Lumsden A, Hypponen E. Relationship between Serum 25(OH)D and Depression: Causal Evidence from a Bi-Directional Mendelian Randomization Study. *Nutrients.* 2020;13(1):1-15. doi:10.3390/nu13010109
96. Jiang X, Ge T, Chen CY. The causal role of circulating vitamin D concentrations in human complex traits and diseases: a large-scale Mendelian randomization study. *Sci. Rep.* 2021;11(1):184. doi:10.1038/s41598-020-80655-w

97. Ong JS, Dixon-Suen SC, Han X, et al. A comprehensive re-assessment of the association between vitamin D and cancer susceptibility using Mendelian randomization. *Nat Commun.* 2021;12(1):246. doi:10.1038/s41467-020-20368-w
98. Harroud A, Manousaki D, Butler-Laporte G, et al. The relative contributions of obesity, vitamin D, leptin, and adiponectin to multiple sclerosis risk: A Mendelian randomization mediation analysis. *Mult. Scler.* 2021;27(13):1994-2000. doi:10.1177/1352458521995484
99. Manousaki D, Harroud A, Mitchell RE, et al. Vitamin D levels and risk of type 1 diabetes: A Mendelian randomization study. *PLoS Med.* 2021;18(2):e1003536. doi:10.1371/journal.pmed.1003536
100. Butler-Laporte G, Nakanishi T, Mooser V, et al. Vitamin D and COVID-19 susceptibility and severity in the COVID-19 Host Genetics Initiative: A Mendelian randomization study. *PLoS Med.* 2021;18(6):e1003605. doi:10.1371/journal.pmed.1003605
101. COVID-19 Host Genetics Initiative. Mapping the human genetic architecture of COVID-19. *Nature.* 2021;600(7889):472-7. doi:10.1038/s41586-021-03767-x
102. Cui Z, Tian Y. Using genetic variants to evaluate the causal effect of serum vitamin D concentration on COVID-19 susceptibility, severity and hospitalization traits: a Mendelian randomization study. *J. Transl. Med.* 2021;19(1):300. doi:10.1186/s12967-021-02973-5
103. Amin HA, Drenos F. No evidence that vitamin D is able to prevent or affect the severity of COVID-19 in individuals with European ancestry: a Mendelian randomisation study of open data. *BMJ Nutr Prev Health.* 2021;4(1):42-8. doi:10.1136/bmjnp-2020-000151
104. Patchen BK, Clark AG, Gaddis N, Hancock DB, Cassano PA. Genetically predicted serum vitamin D and COVID-19: a Mendelian randomisation study. *BMJ Nutr Prev Health.* 2021;4(1):213-25. doi:10.1136/bmjnp-2021-000255
105. Li X, van Geffen J, van Weele M, et al. An observational and Mendelian randomisation study on vitamin D and COVID-19 risk in UK Biobank. *Sci. Rep.* 2021;11(1):18262. doi:10.1038/s41598-021-97679-5
106. Liu D, Tian QY, Zhang J, et al. Association between 25 Hydroxyvitamin D Concentrations and the Risk of COVID-19: A Mendelian Randomization Study. *Biomed. Environ. Sci.* 2021;34(9):750-4. doi:10.3967/bes2021.104
107. Wang R. Mendelian randomization study updates the effect of 25-hydroxyvitamin D levels on the risk of multiple sclerosis. *J. Transl. Med.* 2022;20(1):3. doi:10.1186/s12967-021-03205-6
108. Vandebergh M, Dubois B, Goris A. Effects of Vitamin D and Body Mass Index on Disease Risk and Relapse Hazard in Multiple Sclerosis: A Mendelian Randomization Study. *Neurol Neuroimmunol Neuroinflamm.* 2022;9(3). doi:10.1212/NXI.0000000000001165
109. Olsson E, Byberg L, Karlstrom B, et al. Vitamin D is not associated with incident dementia or cognitive impairment: an 18-y follow-up study in community-living old men. *Am. J. Clin. Nutr.* 2017;105(4):936-43. doi:10.3945/ajcn.116.141531
110. Jorde R, Wilsgaard T, Grimnes G. Polymorphisms in the vitamin D system and mortality - The Tromso study. *J Steroid Biochem Mol Biol.* 2019;195:105481. doi:10.1016/j.jsbmb.2019.105481
111. Larsson SC, Roos PM. Serum 25-hydroxyvitamin D in amyotrophic lateral sclerosis: mendelian randomization study. *Neurobiol. Aging.* 2020;87:140 e1- e3. doi:10.1016/j.neurobiolaging.2019.10.024
112. Wang L, Qiao Y, Zhang H, et al. Circulating Vitamin D Levels and Alzheimer's Disease: A Mendelian Randomization Study in the IGAP and UK Biobank. *J. Alzheimers Dis.* 2020;73(2):609-18. doi:10.3233/JAD-190713
113. Colak Y, Afzal S, Nordestgaard BG. 25-Hydroxyvitamin D and Risk of Osteoporotic Fractures:

- Mendelian Randomization Analysis in 2 Large Population-Based Cohorts. *Clin. Chem.* 2020;66(5):676-85. doi:10.1093/clinchem/hvaa049
114. Zhong Z, Su G, Du L, et al. Higher 25-hydroxyvitamin D level is associated with increased risk for Behcet's disease. *Clin. Nutr.* 2021;40(2):518-24. doi:10.1016/j.clnu.2020.05.049
115. Feng Q, Bonnelykke K, Ek WE, et al. Null association between serum 25-hydroxyvitamin D levels with allergic rhinitis, allergic sensitization and non-allergic rhinitis: A Mendelian randomization study. *Clin Exp Allergy.* 2021;51(1):78-86. doi:10.1111/cea.13739
116. Pilling LC, Jones LC, Masoli JAH, et al. Low Vitamin D Levels and Risk of Incident Delirium in 351,000 Older UK Biobank Participants. *J. Am. Geriatr. Soc.* 2021;69(2):365-72. doi:10.1111/jgs.16853
117. Colak Y, Nordestgaard BG, Afzal S. Low vitamin D and risk of bacterial pneumonias: Mendelian randomisation studies in two population-based cohorts. *Thorax.* 2021;76(5):468-78. doi:10.1136/thoraxjnl-2020-215288
118. Zanetti D, Gustafsson S, Assimes TL, Ingelsson E. Comprehensive Investigation of Circulating Biomarkers and Their Causal Role in Atherosclerosis-Related Risk Factors and Clinical Events. *Circ Genom Precis Med.* 2020;13(6):e002996. doi:10.1161/CIRCGEN.120.002996
119. Liu H, Jiang X, Qiao Q, et al. Association of circulating 25-Hydroxyvitamin D and its related genetic variations with hepatocellular carcinoma incidence and survival. *Ann Transl Med.* 2020;8(17):1080. doi:10.21037/atm-20-1637
120. Libuda L, Naaresh R, Ludwig C, et al. A mendelian randomization study on causal effects of 25(OH)vitamin D levels on attention deficit/hyperactivity disorder. *Eur. J. Nutr.* 2021;60(5):2581-91. doi:10.1007/s00394-020-02439-2
121. Xu Y, Zhou Y, Liu J, et al. Genetically increased circulating 25(OH)D level reduces the risk of type 2 diabetes in subjects with deficiency of vitamin D: A large-scale Mendelian randomization study. *Medicine (Baltimore).* 2020;99(51):e23672. doi:10.1097/MD.00000000000023672
122. Bergink AP, Trajanoska K, Uitterlinden AG, van Meurs JBJ. Mendelian randomization study on vitamin D levels and osteoarthritis risk: a concise report. *Rheumatology (Oxford).* 2021;60(7):3409-12. doi:10.1093/rheumatology/keaa697
123. Yuan S, Tomson T, Larsson SC. Modifiable risk factors for epilepsy: A two-sample Mendelian randomization study. *Brain and behavior.* 2021;11(5):e02098. doi:10.1002/brb3.2098
124. Qu Z, Yang F, Yan Y, et al. A Mendelian randomization study on the role of serum parathyroid hormone and 25-hydroxyvitamin D in osteoarthritis. *Osteoarthritis Cartilage.* 2021;29(9):1282-90. doi:10.1016/j.joca.2021.04.015
125. Du M, Garcia JGN, Christie JD, et al. Integrative omics provide biological and clinical insights into acute respiratory distress syndrome. *Intensive Care Med.* 2021;47(7):761-71. doi:10.1007/s00134-021-06410-5
126. Xiao J, Lv J, Wang S, et al. Association of serum 25-hydroxyvitamin D with metabolic syndrome and type 2 diabetes: a one sample Mendelian randomization study. *BMC Geriatr.* 2021;21(1):391. doi:10.1186/s12877-021-02307-6
127. Bejar CA, Goyal S, Afzal S, et al. A Bidirectional Mendelian Randomization Study to evaluate the causal role of reduced blood vitamin D levels with type 2 diabetes risk in South Asians and Europeans. *Nutr. J.* 2021;20(1):71. doi:10.1186/s12937-021-00725-1
128. Dodhia SA, West NX, Thomas SJ, et al. Examining the causal association between 25-hydroxyvitamin D and caries in children and adults: a two-sample Mendelian randomization approach.

- Wellcome open research. 2020;5:281. doi:10.12688/wellcomeopenres.16369.2
129. He Y, Zhang X, Timofeeva M, et al. Bidirectional Mendelian randomisation analysis of the relationship between circulating vitamin D concentration and colorectal cancer risk. *Int. J. Cancer*. 2022;150(2):303-7. doi:10.1002/ijc.33779
130. Jiang J, Shao M, Wu X. Vitamin D and risk of ankylosing spondylitis: A two-sample mendelian randomization study. *Hum. Immunol*. 2022;83(1):81-5. doi:10.1016/j.humimm.2021.09.003
131. Chan YH, Schooling CM, Zhao J, et al. Mendelian Randomization Focused Analysis of Vitamin D on the Secondary Prevention of Ischemic Stroke. *Stroke*. 2021;52(12):3926-37. doi:10.1161/STROKEAHA.120.032634
132. Chen S, Yang F, Xu T, et al. The impact of serum 25-hydroxyvitamin D, calcium, and parathyroid hormone levels on the risk of coronary artery disease in patients with diabetes: a Mendelian randomization study. *Nutr. J*. 2021;20(1):82. doi:10.1186/s12937-021-00735-z
133. Yuan S, Baron JA, Michaelsson K, Larsson SC. Serum calcium and 25-hydroxyvitamin D in relation to longevity, cardiovascular disease and cancer: a Mendelian randomization study. *NPJ Genom Med*. 2021;6(1):86. doi:10.1038/s41525-021-00250-4
134. Yuan S, Bruzelius M, Damrauer SM, Larsson SC. Cardiometabolic, Lifestyle, and Nutritional Factors in Relation to Varicose Veins: A Mendelian Randomization Study. *Journal of the American Heart Association*. 2021;10(21):e022286. doi:10.1161/JAHA.121.022286
135. Jian Z, Huang Y, He Y, et al. Genetically Predicted Lifelong Circulating 25(OH)D Levels are Associated With Serum Calcium Levels and Kidney Stone Risk. *J. Clin. Endocrinol. Metab*. 2022;107(3):e1159-e66. doi:10.1210/clinem/dgab758
136. Emerging Risk Factors Collaboration E-CVDVDS. Estimating dose-response relationships for vitamin D with coronary heart disease, stroke, and all-cause mortality: observational and Mendelian randomisation analyses. *The lancet. Diabetes & endocrinology*. 2021;9(12):837-46. doi:10.1016/S2213-8587(21)00263-1
137. Arathimos R, Ronaldson A, Howe LJ, et al. Vitamin D and the risk of treatment-resistant and atypical depression: A Mendelian randomization study. *Transl Psychiatry*. 2021;11(1):561. doi:10.1038/s41398-021-01674-3
138. Clarke SL, Mitchell RE, Sharp GC, Ramanan AV, Relton CL. Vitamin D levels and risk of juvenile idiopathic arthritis: A Mendelian randomization study. *Arthritis Care Res. (Hoboken)*. 2021. doi:10.1002/acr.24815
139. Zhou A, Selvanayagam JB, Hyppönen E. Non-linear Mendelian randomization analyses support a role for vitamin D deficiency in cardiovascular disease risk. *Eur. Heart J*. 2022;43(18):1731-9. doi:10.1093/eurheartj/ehab809
140. Baumeister SE, Reckelkamm SL, Baurecht H, et al. A Mendelian randomization study on the effect of 25-hydroxyvitamin D levels on periodontitis. *J Periodontol*. 2022;93(8):1243-9. doi:10.1002/JPER.21-0463
141. Song J, Liu K, Chen W, et al. Circulating Vitamin D Levels and Risk of Vitiligo: Evidence From Meta-Analysis and Two-Sample Mendelian Randomization. *Front Nutr*. 2021;8:782270. doi:10.3389/fnut.2021.782270
142. Chan YH, Schooling CM, Zhao JV, et al. Mendelian randomization analysis of vitamin D in the secondary prevention of hypertensive-diabetic subjects: role of facilitating blood pressure control. *Genes Nutr*. 2022;17(1):1. doi:10.1186/s12263-022-00704-z
143. Yuan S, Larsson SC. Inverse Association Between Serum 25-Hydroxyvitamin D and

- Nonalcoholic Fatty Liver Disease. *Clin. Gastroenterol. Hepatol.* 2022. doi:10.1016/j.cgh.2022.01.021
144. Hu Z, Zhou F, Xu H. Circulating vitamin C and D concentrations and risk of dental caries and periodontitis: A Mendelian randomization study. *J. Clin. Periodontol.* 2022;49(4):335-44. doi:10.1111/jcpe.13598
145. Xia K, Wang Y, Zhang L, et al. Dietary-Derived Essential Nutrients and Amyotrophic Lateral Sclerosis: A Two-Sample Mendelian Randomization Study. *Nutrients.* 2022;14(5). doi:10.3390/nu14050920
146. Yang S, Zhi H, Sun Y, Wang L. Circulating Vitamin D Levels and the Risk of Atrial Fibrillation: A Two-Sample Mendelian Randomization Study. *Front Nutr.* 2022;9:837207. doi:10.3389/fnut.2022.837207
147. Navale SS, Mulugeta A, Zhou A, Llewellyn DJ, Hypponen E. Vitamin D and brain health: an observational and Mendelian randomization study. *Am J Clin Nutr.* 2022;116(2):531-40. doi:10.1093/ajcn/nqac107
148. Gu D, Tang M, Wang Y, et al. The Causal Relationships Between Extrinsic Exposures and Risk of Prostate Cancer: A Phenome-Wide Mendelian Randomization Study. *Front. Oncol.* 2022;12:829248. doi:10.3389/fonc.2022.829248
149. Huang N, Zhuang Z, Liu Z, Huang T. Observational and Genetic Associations of Modifiable Risk Factors with Aortic Valve Stenosis: A Prospective Cohort Study of 0.5 Million Participants. *Nutrients.* 2022;14(11). doi:10.3390/nu14112273
150. Gao N, Li X, Kong M, et al. Associations Between Vitamin D Levels and Risk of Heart Failure: A Bidirectional Mendelian Randomization Study. *Front Nutr.* 2022;9:910949. doi:10.3389/fnut.2022.910949
151. Meng L, Wang Z, Ming YC, Shen L, Ji HF. Are micronutrient levels and supplements causally associated with the risk of Alzheimer's disease? A two-sample Mendelian randomization analysis. *Food Funct.* 2022;13(12):6665-73. doi:10.1039/d1fo03574f
152. Daniel N, Bouras E, Tsilidis KK, Hughes DJ. Genetically Predicted Circulating Concentrations of Micronutrients and COVID-19 Susceptibility and Severity: A Mendelian Randomization Study. *Front Nutr.* 2022;9:842315. doi:10.3389/fnut.2022.842315
153. Szejko N, Acosta JN, Both CP, et al. Genetically-Proxied Levels of Vitamin D and Risk of Intracerebral Hemorrhage. *J Am Heart Assoc.* 2022;11(13):e024141. doi:10.1161/jaha.121.024141
154. Zhang N, Wang Y, Chen Z, et al. Circulating Vitamin D Concentrations and Risk of Atrial Fibrillation: A Mendelian Randomization Study Using Non-deficient Range Summary Statistics. *Front Nutr.* 2022;9:842392. doi:10.3389/fnut.2022.842392
155. Sha T, Li W, He H, Wu J, Wang Y, Li H. Causal Relationship of Genetically Predicted Serum Micronutrients Levels With Sarcopenia: A Mendelian Randomization Study. *Front Nutr.* 2022;9:913155. doi:10.3389/fnut.2022.913155
156. Susarla G, Chan W, Li A, et al. Mendelian Randomization Shows a Causal Effect of Low Vitamin D on Non-infectious Uveitis and Scleritis Risk. *Am J Ophthalmol.* 2022;244:11-8. doi:10.1016/j.ajo.2022.08.001
157. Zhang Y, Jing D, Zhou G, et al. Evidence of a Causal Relationship Between Vitamin D Status and Risk of Psoriasis From the UK Biobank Study. *Front Nutr.* 2022;9:807344. doi:10.3389/fnut.2022.807344
158. Liu H, Shen X, Yu T, et al. A putative causality of vitamin D in common diseases: A mendelian randomization study. *Front Nutr.* 2022;9:938356. doi:10.3389/fnut.2022.938356

159. Li SS, Gao LH, Zhang XY, et al. Genetically Low Vitamin D Levels, Bone Mineral Density, and Bone Metabolism Markers: a Mendelian Randomisation Study. *Sci Rep.* 2016;6:33202. doi:10.1038/srep33202
160. Larsson SC, Melhus H, Michaelsson K. Circulating Serum 25-Hydroxyvitamin D Levels and Bone Mineral Density: Mendelian Randomization Study. *J. Bone Miner. Res.* 2018;33(5):840-4. doi:10.1002/jbmr.3389
161. Sun JY, Zhao M, Hou Y, et al. Circulating serum vitamin D levels and total body bone mineral density: A Mendelian randomization study. *J. Cell. Mol. Med.* 2019;23(3):2268-71. doi:10.1111/jcmm.14153
162. Tang Y, Wei F, Yu M, et al. Absence of causal association between Vitamin D and bone mineral density across the lifespan: a Mendelian randomization study. *Sci Rep.* 2022;12(1):10408. doi:10.1038/s41598-022-14548-5
163. Chakhtoura M, Bacha DS, Gharios C, et al. Vitamin D Supplementation and Fractures in Adults: A Systematic Umbrella Review of Meta-Analyses of Controlled Trials. *J Clin Endocrinol Metab.* 2022;107(3):882-98. doi:10.1210/clinem/dgab742
164. Bolland MJ, Grey A, Avenell A. Effects of vitamin D supplementation on musculoskeletal health: a systematic review, meta-analysis, and trial sequential analysis. *Lancet Diabetes Endocrinol.* 2018;6(11):847-58. doi:10.1016/s2213-8587(18)30265-1
165. Yao P, Bennett D, Mafham M, et al. Vitamin D and Calcium for the Prevention of Fracture: A Systematic Review and Meta-analysis. *JAMA Netw Open.* 2019;2(12):e1917789. doi:10.1001/jamanetworkopen.2019.17789
166. Khaw KT, Stewart AW, Waayer D, et al. Effect of monthly high-dose vitamin D supplementation on falls and non-vertebral fractures: secondary and post-hoc outcomes from the randomised, double-blind, placebo-controlled ViDA trial. *Lancet Diabetes Endocrinol.* 2017;5(6):438-47. doi:10.1016/S2213-8587(17)30103-1
167. Bischoff-Ferrari HA, Vellas B, Rizzoli R, et al. Effect of Vitamin D Supplementation, Omega-3 Fatty Acid Supplementation, or a Strength-Training Exercise Program on Clinical Outcomes in Older Adults: The DO-HEALTH Randomized Clinical Trial. *Jama.* 2020;324(18):1855-68. doi:10.1001/jama.2020.16909
168. LeBoff MS, Chou SH, Ratliff KA, et al. Supplemental Vitamin D and Incident Fractures in Midlife and Older Adults. *N Engl J Med.* 2022;387(4):299-309. doi:10.1056/NEJMoa2202106
169. Murdaca G, Tonacci A, Negrini S, et al. Emerging role of vitamin D in autoimmune diseases: An update on evidence and therapeutic implications. *Autoimmun Rev.* 2019;18(9):102350. doi:10.1016/j.autrev.2019.102350
170. Munger KL, Levin LI, Hollis BW, Howard NS, Ascherio A. Serum 25-hydroxyvitamin D levels and risk of multiple sclerosis. *JAMA.* 2006;296(23):2832-8. doi:10.1001/jama.296.23.2832
171. Simpson S, Jr., Taylor B, Blizzard L, et al. Higher 25-hydroxyvitamin D is associated with lower relapse risk in multiple sclerosis. *Ann Neurol.* 2010;68(2):193-203. doi:10.1002/ana.22043
172. Hahn J, Cook NR, Alexander EK, et al. Vitamin D and marine omega 3 fatty acid supplementation and incident autoimmune disease: VITAL randomized controlled trial. *Bmj.* 2022;376:e066452. doi:10.1136/bmj-2021-066452
173. Jolliffe DA, Camargo CA, Jr., Sluyter JD, et al. Vitamin D supplementation to prevent acute respiratory infections: a systematic review and meta-analysis of aggregate data from randomised controlled trials. *Lancet Diabetes Endocrinol.* 2021;9(5):276-92. doi:10.1016/s2213-8587(21)00051-6

174. Kumar J, Kumar P, Goyal JP, et al. Vitamin D supplementation in childhood asthma: a systematic review and meta-analysis of randomised controlled trials. *ERJ Open Res.* 2022;8(1). doi:10.1183/23120541.00662-2021
175. Du Y, Liang F, Zhang L, Liu J, Dou H. Vitamin D Supplement for Prevention of Alzheimer's Disease: A Systematic Review and Meta-Analysis. *Am J Ther.* 2020;28(6):e638-e48. doi:10.1097/mjt.0000000000001302
176. Barbarawi M, Kheiri B, Zayed Y, et al. Vitamin D Supplementation and Cardiovascular Disease Risks in More Than 83 000 Individuals in 21 Randomized Clinical Trials: A Meta-analysis. *JAMA Cardiol.* 2019;4(8):765-76. doi:10.1001/jamacardio.2019.1870
177. Manson JE, Cook NR, Lee IM, et al. Vitamin D Supplements and Prevention of Cancer and Cardiovascular Disease. *N. Engl. J. Med.* 2019;380(1):33-44. doi:10.1056/NEJMoa1809944
178. Scragg R, Stewart AW, Waayer D, et al. Effect of Monthly High-Dose Vitamin D Supplementation on Cardiovascular Disease in the Vitamin D Assessment Study : A Randomized Clinical Trial. *JAMA Cardiol.* 2017;2(6):608-16. doi:10.1001/jamacardio.2017.0175
179. Virtanen JK, Nurmi T, Aro A, et al. Vitamin D supplementation and prevention of cardiovascular disease and cancer in the Finnish Vitamin D Trial: a randomized controlled trial. *Am J Clin Nutr.* 2022;115(5):1300-10. doi:10.1093/ajcn/nqab419
180. Djoussé L, Cook NR, Kim E, et al. Supplementation With Vitamin D and Omega-3 Fatty Acids and Incidence of Heart Failure Hospitalization: VITAL-Heart Failure. *Circulation.* 2020;141(9):784-6. doi:10.1161/circulationaha.119.044645
181. Han J, Guo X, Yu X, et al. 25-Hydroxyvitamin D and Total Cancer Incidence and Mortality: A Meta-Analysis of Prospective Cohort Studies. *Nutrients.* 2019;11(10). doi:10.3390/nu11102295
182. Chandler PD, Chen WY, Ajala ON, et al. Effect of Vitamin D3 Supplements on Development of Advanced Cancer: A Secondary Analysis of the VITAL Randomized Clinical Trial. *JAMA Netw Open.* 2020;3(11):e2025850. doi:10.1001/jamanetworkopen.2020.25850
183. Scragg R, Khaw KT, Toop L, et al. Monthly High-Dose Vitamin D Supplementation and Cancer Risk: A Post Hoc Analysis of the Vitamin D Assessment Randomized Clinical Trial. *JAMA oncology.* 2018;4(11):e182178. doi:10.1001/jamaoncol.2018.2178
184. Keum N, Lee DH, Greenwood DC, Manson JE, Giovannucci E. Vitamin D supplementation and total cancer incidence and mortality: a meta-analysis of randomized controlled trials. *Ann Oncol.* 2019;30(5):733-43. doi:10.1093/annonc/mdz059
185. Guo Z, Huang M, Fan D, et al. Association between vitamin D supplementation and cancer incidence and mortality: A trial sequential meta-analysis of randomized controlled trials. *Crit Rev Food Sci Nutr.* 2022;1-15. doi:10.1080/10408398.2022.2056574
186. Emmanouilidou G, Kalopitas G, Bakaloudi DR, et al. Vitamin D as a chemopreventive agent in colorectal neoplasms. A systematic review and meta-analysis of randomized controlled trials. *Pharmacol Ther.* 2022;237:108252. doi:10.1016/j.pharmthera.2022.108252
187. Ali S, Pham H, Waterhouse M, et al. The effect of vitamin D supplementation on risk of keratinocyte cancer: an exploratory analysis of the D-Health randomized controlled trial. *Br J Dermatol.* 2022. doi:10.1111/bjd.21742
188. Passarelli MN, Karagas MR, Mott LA, Rees JR, Barry EL, Baron JA. Risk of keratinocyte carcinomas with vitamin D and calcium supplementation: a secondary analysis of a randomized clinical trial. *Am J Clin Nutr.* 2020;112(6):1532-9. doi:10.1093/ajcn/nqaa267
189. Sutherland JP, Zhou A, Hyppönen E. Vitamin D Deficiency Increases Mortality Risk in the UK

- Biobank. *Annals of Internal Medicine*. 2022. doi:10.7326/M21-3324
190. Neale RE, Baxter C, Romero BD, et al. The D-Health Trial: a randomised controlled trial of the effect of vitamin D on mortality. *Lancet Diabetes Endocrinol*. 2022;10(2):120-8. doi:10.1016/s2213-8587(21)00345-4
191. Zhang Y, Fang F, Tang J, et al. Association between vitamin D supplementation and mortality: systematic review and meta-analysis. *BMJ*. 2019;366:l4673. doi:10.1136/bmj.l4673
192. Chen QY, Kim S, Lee B, et al. Post-Diagnosis Vitamin D Supplement Use and Survival among Cancer Patients: A Meta-Analysis. *Nutrients*. 2022;14(16). doi:10.3390/nu14163418
193. Vaughan-Shaw PG, Buijs LF, Blackmur JP, et al. The effect of vitamin D supplementation on survival in patients with colorectal cancer: systematic review and meta-analysis of randomised controlled trials. *Br J Cancer*. 2020;123(11):1705-12. doi:10.1038/s41416-020-01060-8
194. Cui X, Eyles DW. Vitamin D and the Central Nervous System: Causative and Preventative Mechanisms in Brain Disorders. *Nutrients*. 2022;14(20):4353.
195. Khoshbakht Y, Bidaki R, Salehi-Abargouei A. Vitamin D Status and Attention Deficit Hyperactivity Disorder: A Systematic Review and Meta-Analysis of Observational Studies. *Adv Nutr*. 2018;9(1):9-20. doi:10.1093/advances/nmx002
196. Li H, Sun D, Wang A, et al. Serum 25-Hydroxyvitamin D Levels and Depression in Older Adults: A Dose-Response Meta-Analysis of Prospective Cohort Studies. *Am J Geriatr Psychiatry*. 2019;27(11):1192-202. doi:10.1016/j.jagp.2019.05.022
197. Chen H, Xue W, Li J, et al. 25-Hydroxyvitamin D Levels and the Risk of Dementia and Alzheimer's Disease: A Dose-Response Meta-Analysis. *Front Aging Neurosci*. 2018;10:368. doi:10.3389/fnagi.2018.00368
198. Zhu JL, Luo WW, Cheng X, Li Y, Zhang QZ, Peng WX. Vitamin D deficiency and Schizophrenia in Adults: A Systematic Review and Meta-analysis of Observational Studies. *Psychiatry Res*. 2020;288:112959. doi:10.1016/j.psychres.2020.112959
199. Juntas-Morales R, Pageot N, Marin G, et al. Low 25OH Vitamin D Blood Levels Are Independently Associated With Higher Amyotrophic Lateral Sclerosis Severity Scores: Results From a Prospective Study. *Front Neurol*. 2020;11:363. doi:10.3389/fneur.2020.00363
200. Miller JW, Harvey DJ, Beckett LA, et al. Vitamin D Status and Rates of Cognitive Decline in a Multiethnic Cohort of Older Adults. *JAMA Neurol*. 2015;72(11):1295-303. doi:10.1001/jamaneurol.2015.2115
201. Kang JH, Vyas CM, Okereke OI, et al. Effect of vitamin D on cognitive decline: results from two ancillary studies of the VITAL randomized trial. *Sci Rep*. 2021;11(1):23253. doi:10.1038/s41598-021-02485-8
202. Schietzel S, Fischer K, Brugger P, et al. Effect of 2000 IU compared with 800 IU vitamin D on cognitive performance among adults age 60 years and older: a randomized controlled trial. *Am J Clin Nutr*. 2019;110(1):246-53. doi:10.1093/ajcn/nqz081
203. Pittas AG, Dawson-Hughes B, Sheehan P, et al. Vitamin D Supplementation and Prevention of Type 2 Diabetes. *N. Engl. J. Med*. 2019;381(6):520-30. doi:10.1056/NEJMoa1900906
204. Kawahara T, Suzuki G, Mizuno S, et al. Effect of active vitamin D treatment on development of type 2 diabetes: DPVD randomised controlled trial in Japanese population. *Bmj*. 2022;377:e066222. doi:10.1136/bmj-2021-066222
205. Jorde R, Sollid ST, Svartberg J, et al. Vitamin D 20,000 IU per Week for Five Years Does Not Prevent Progression From Prediabetes to Diabetes. *J Clin Endocrinol Metab*. 2016;101(4):1647-55.



doi:10.1210/jc.2015-4013

206. Zhang Y, Tan H, Tang J, et al. Effects of Vitamin D Supplementation on Prevention of Type 2 Diabetes in Patients With Prediabetes: A Systematic Review and Meta-analysis. *Diabetes Care*. 2020;43(7):1650-8. doi:10.2337/dc19-1708
207. Ooi EM, Afzal S, Nordestgaard BG. Elevated remnant cholesterol in 25-hydroxyvitamin D deficiency in the general population: Mendelian randomization study. *Circ Cardiovasc Genet*. 2014;7(5):650-8. doi:10.1161/CIRCGENETICS.113.000416
208. Dibaba DT. Effect of vitamin D supplementation on serum lipid profiles: a systematic review and meta-analysis. *Nutr Rev*. 2019;77(12):890-902. doi:10.1093/nutrit/nuz037
209. Rahman ST, Waterhouse M, Romero BD, et al. Vitamin D supplementation and the incidence of cataract surgery in older Australian adults. *Ophthalmology*. 2022. doi:10.1016/j.ophtha.2022.09.015
210. Malihi Z, Wu Z, Stewart AW, Lawes CM, Scragg R. Hypercalcemia, hypercalciuria, and kidney stones in long-term studies of vitamin D supplementation: a systematic review and meta-analysis. *Am J Clin Nutr*. 2016;104(4):1039-51. doi:10.3945/ajcn.116.134981
211. Malihi Z, Wu Z, Lawes CMM, Scragg R. Adverse events from large dose vitamin D supplementation taken for one year or longer. *J Steroid Biochem Mol Biol*. 2019;188:29-37. doi:10.1016/j.jsbmb.2018.12.002
212. Malihi Z, Lawes CMM, Wu Z, et al. Monthly high-dose vitamin D supplementation does not increase kidney stone risk or serum calcium: results from a randomized controlled trial. *Am J Clin Nutr*. 2019;109(6):1578-87. doi:10.1093/ajcn/nqy378
213. Taylor EN, Hoofnagle AN, Curhan GC. Calcium and phosphorus regulatory hormones and risk of incident symptomatic kidney stones. *Clin J Am Soc Nephrol*. 2015;10(4):667-75. doi:10.2215/cjn.07060714
214. Institute of Medicine. *Dietary Reference Intakes for Calcium and Vitamin D*. Washington (DC): National Academies Press (US); 2011.
215. Letavernier E, Verrier C, Goussard F, et al. Calcium and vitamin D have a synergistic role in a rat model of kidney stone disease. *Kidney Int*. 2016;90(4):809-17. doi:10.1016/j.kint.2016.05.027
216. Billington EO, Burt LA, Rose MS, et al. Safety of High-Dose Vitamin D Supplementation: Secondary Analysis of a Randomized Controlled Trial. *J Clin Endocrinol Metab*. 2020;105(4). doi:10.1210/clinem/dgz212
217. Grossman DC, Curry SJ, Owens DK, et al. Vitamin D, Calcium, or Combined Supplementation for the Primary Prevention of Fractures in Community-Dwelling Adults: US Preventive Services Task Force Recommendation Statement. *JAMA*. 2018;319(15):1592-9. doi:10.1001/jama.2018.3185

## **Figure Captions**

**Fig. 1** Mendelian randomization results of the association between genetically determined 25(OH)D and risk of all-cause and cause-specific mortality.

**Fig. 2** Mendelian randomization results of the association between genetically determined 25(OH)D and risk of allergic and autoimmune diseases.

**Fig. 3** Mendelian randomization results of the association between genetically determined 25(OH)D and risk of cardiovascular diseases.

**Fig. 4** Mendelian randomization results of the association between genetically determined 25(OH)D and risk of musculoskeletal diseases.

**Fig. 5** Mendelian randomization results of the association between genetically determined 25(OH)D and risk of neurophysiologic diseases.

**Fig. 6** Mendelian randomization results of the association between genetically determined 25(OH)D and cancer incidence and survival.

**Fig. 7** Mendelian randomization results of the association between genetically determined 25(OH)D and risk of other diseases.

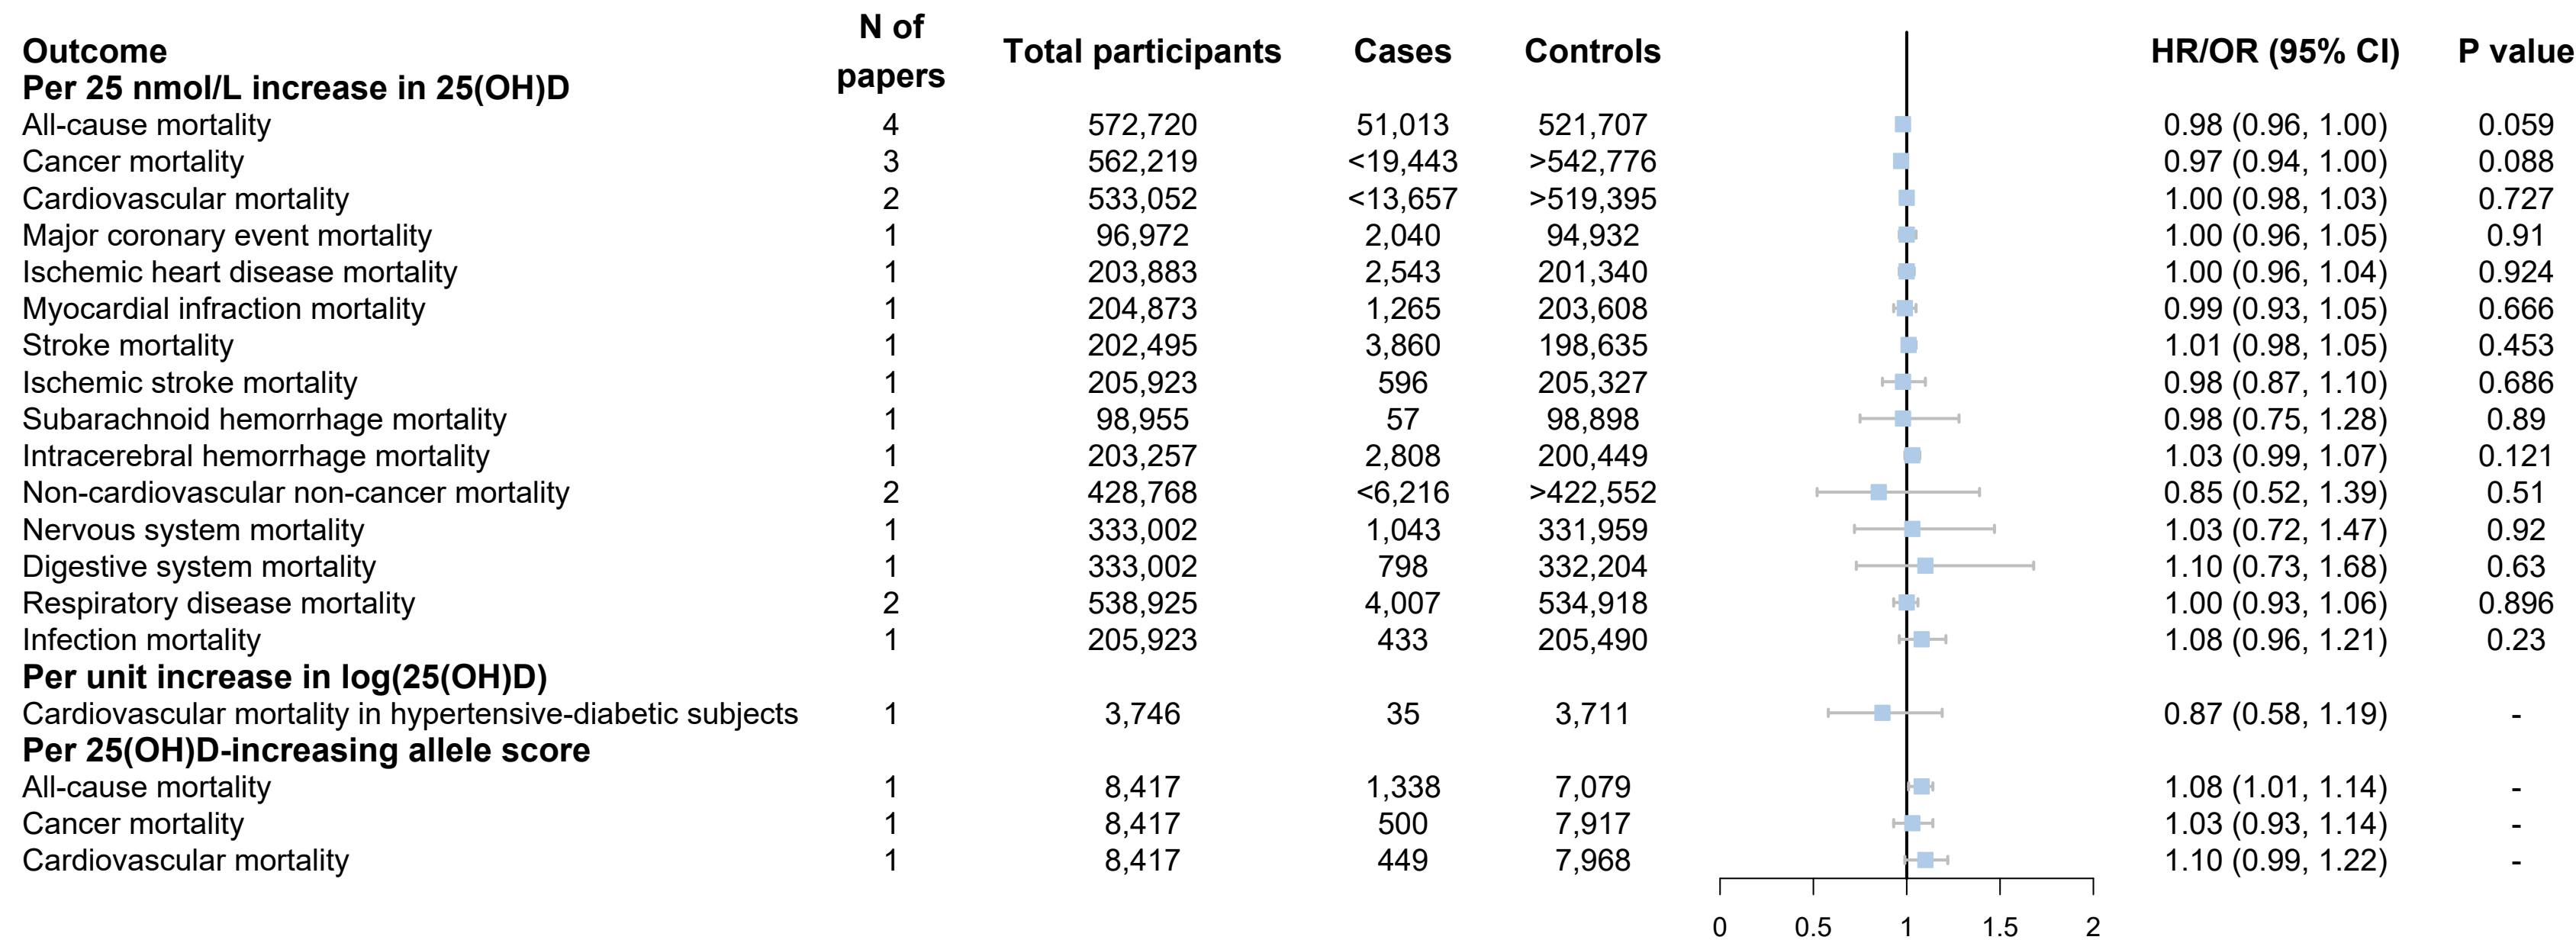

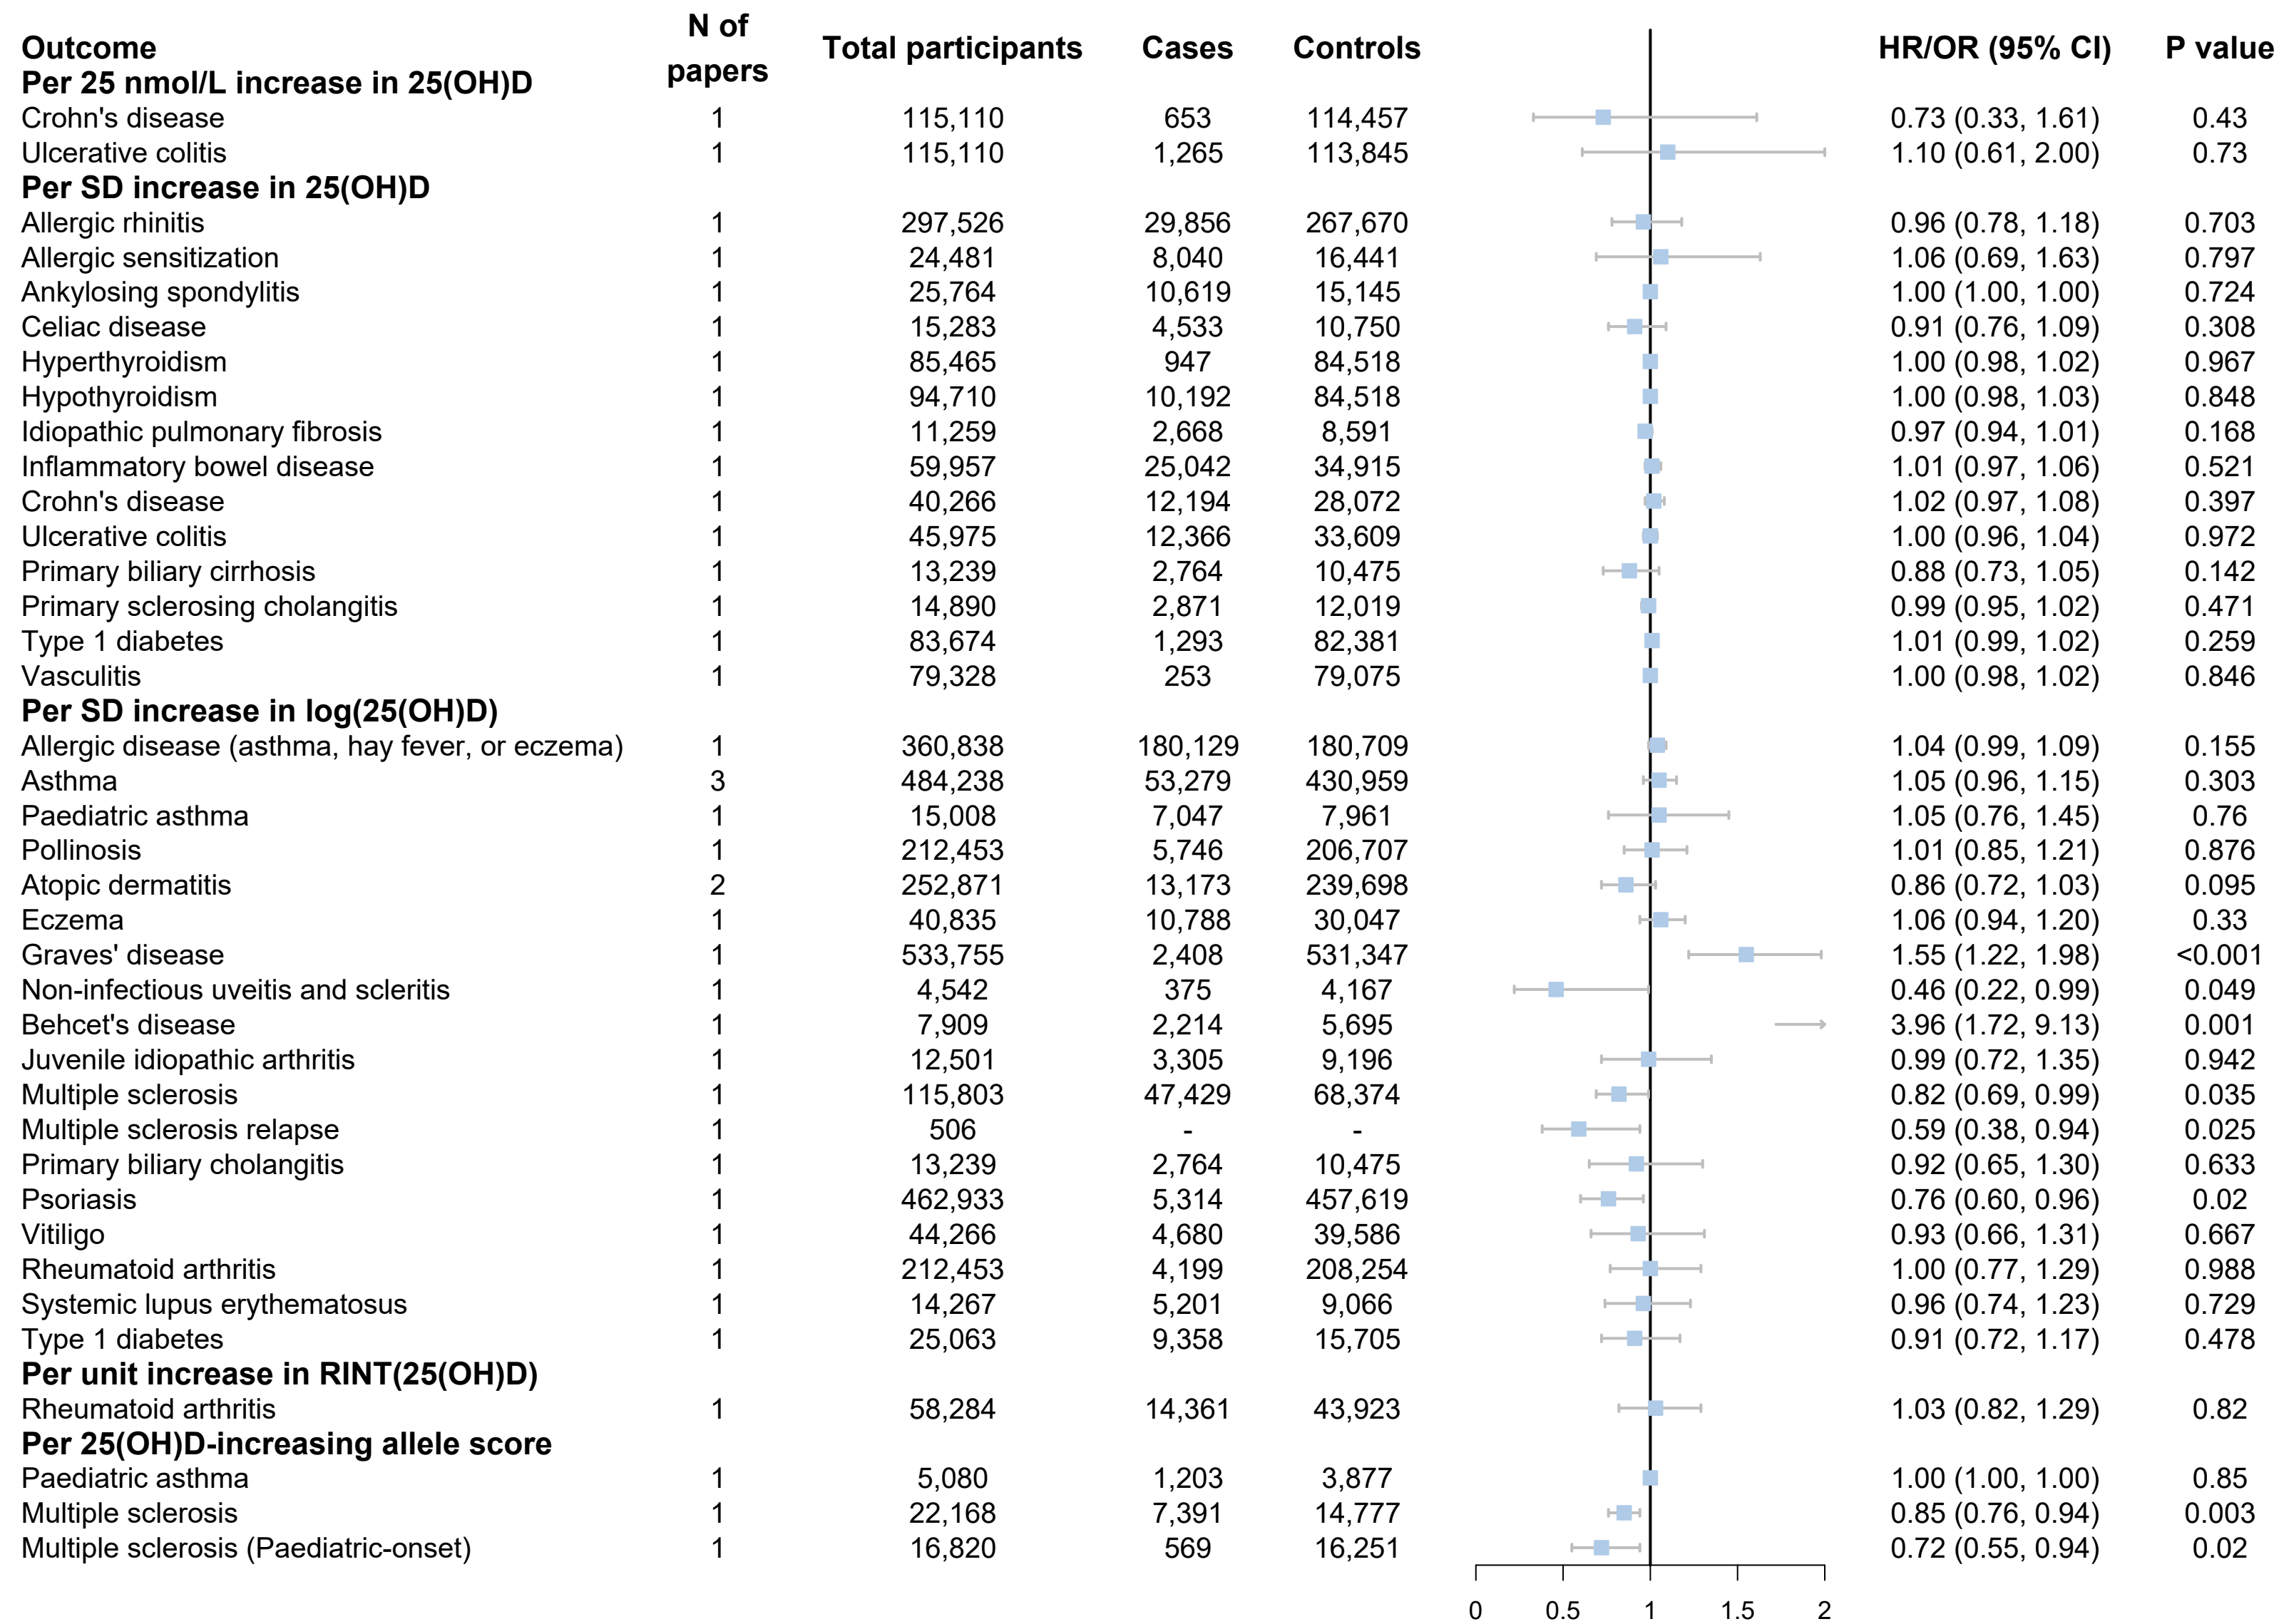

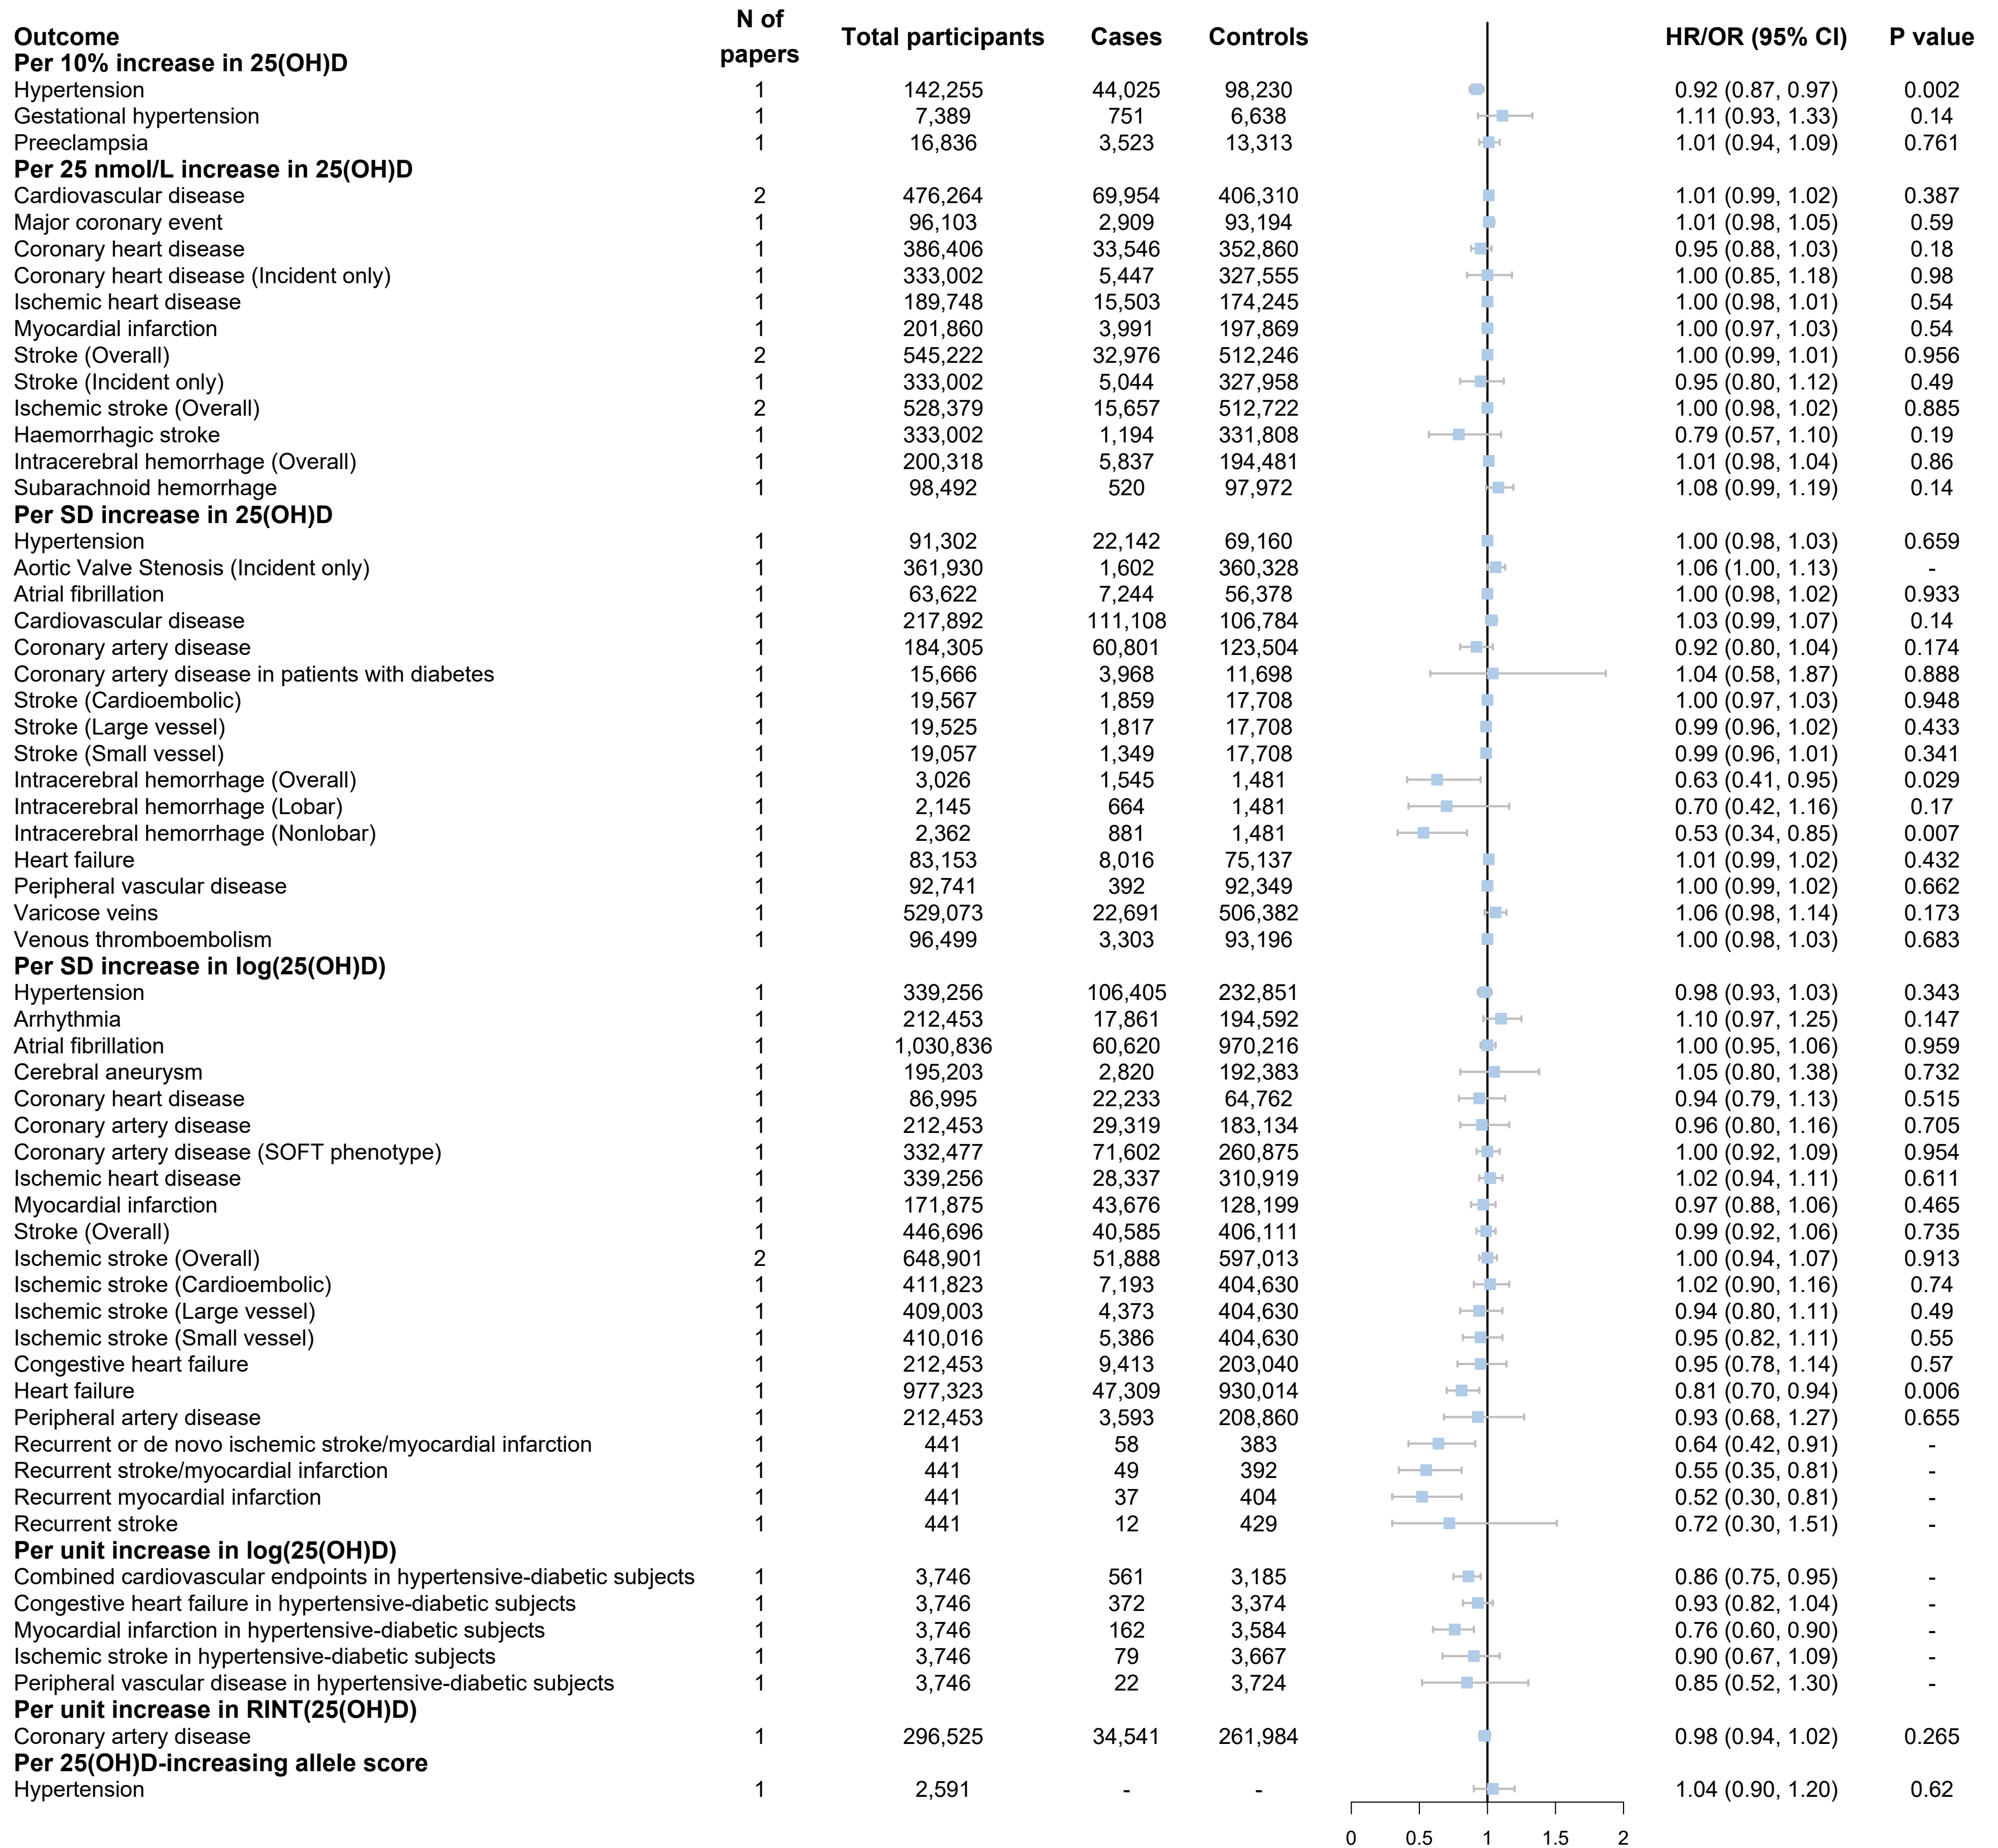

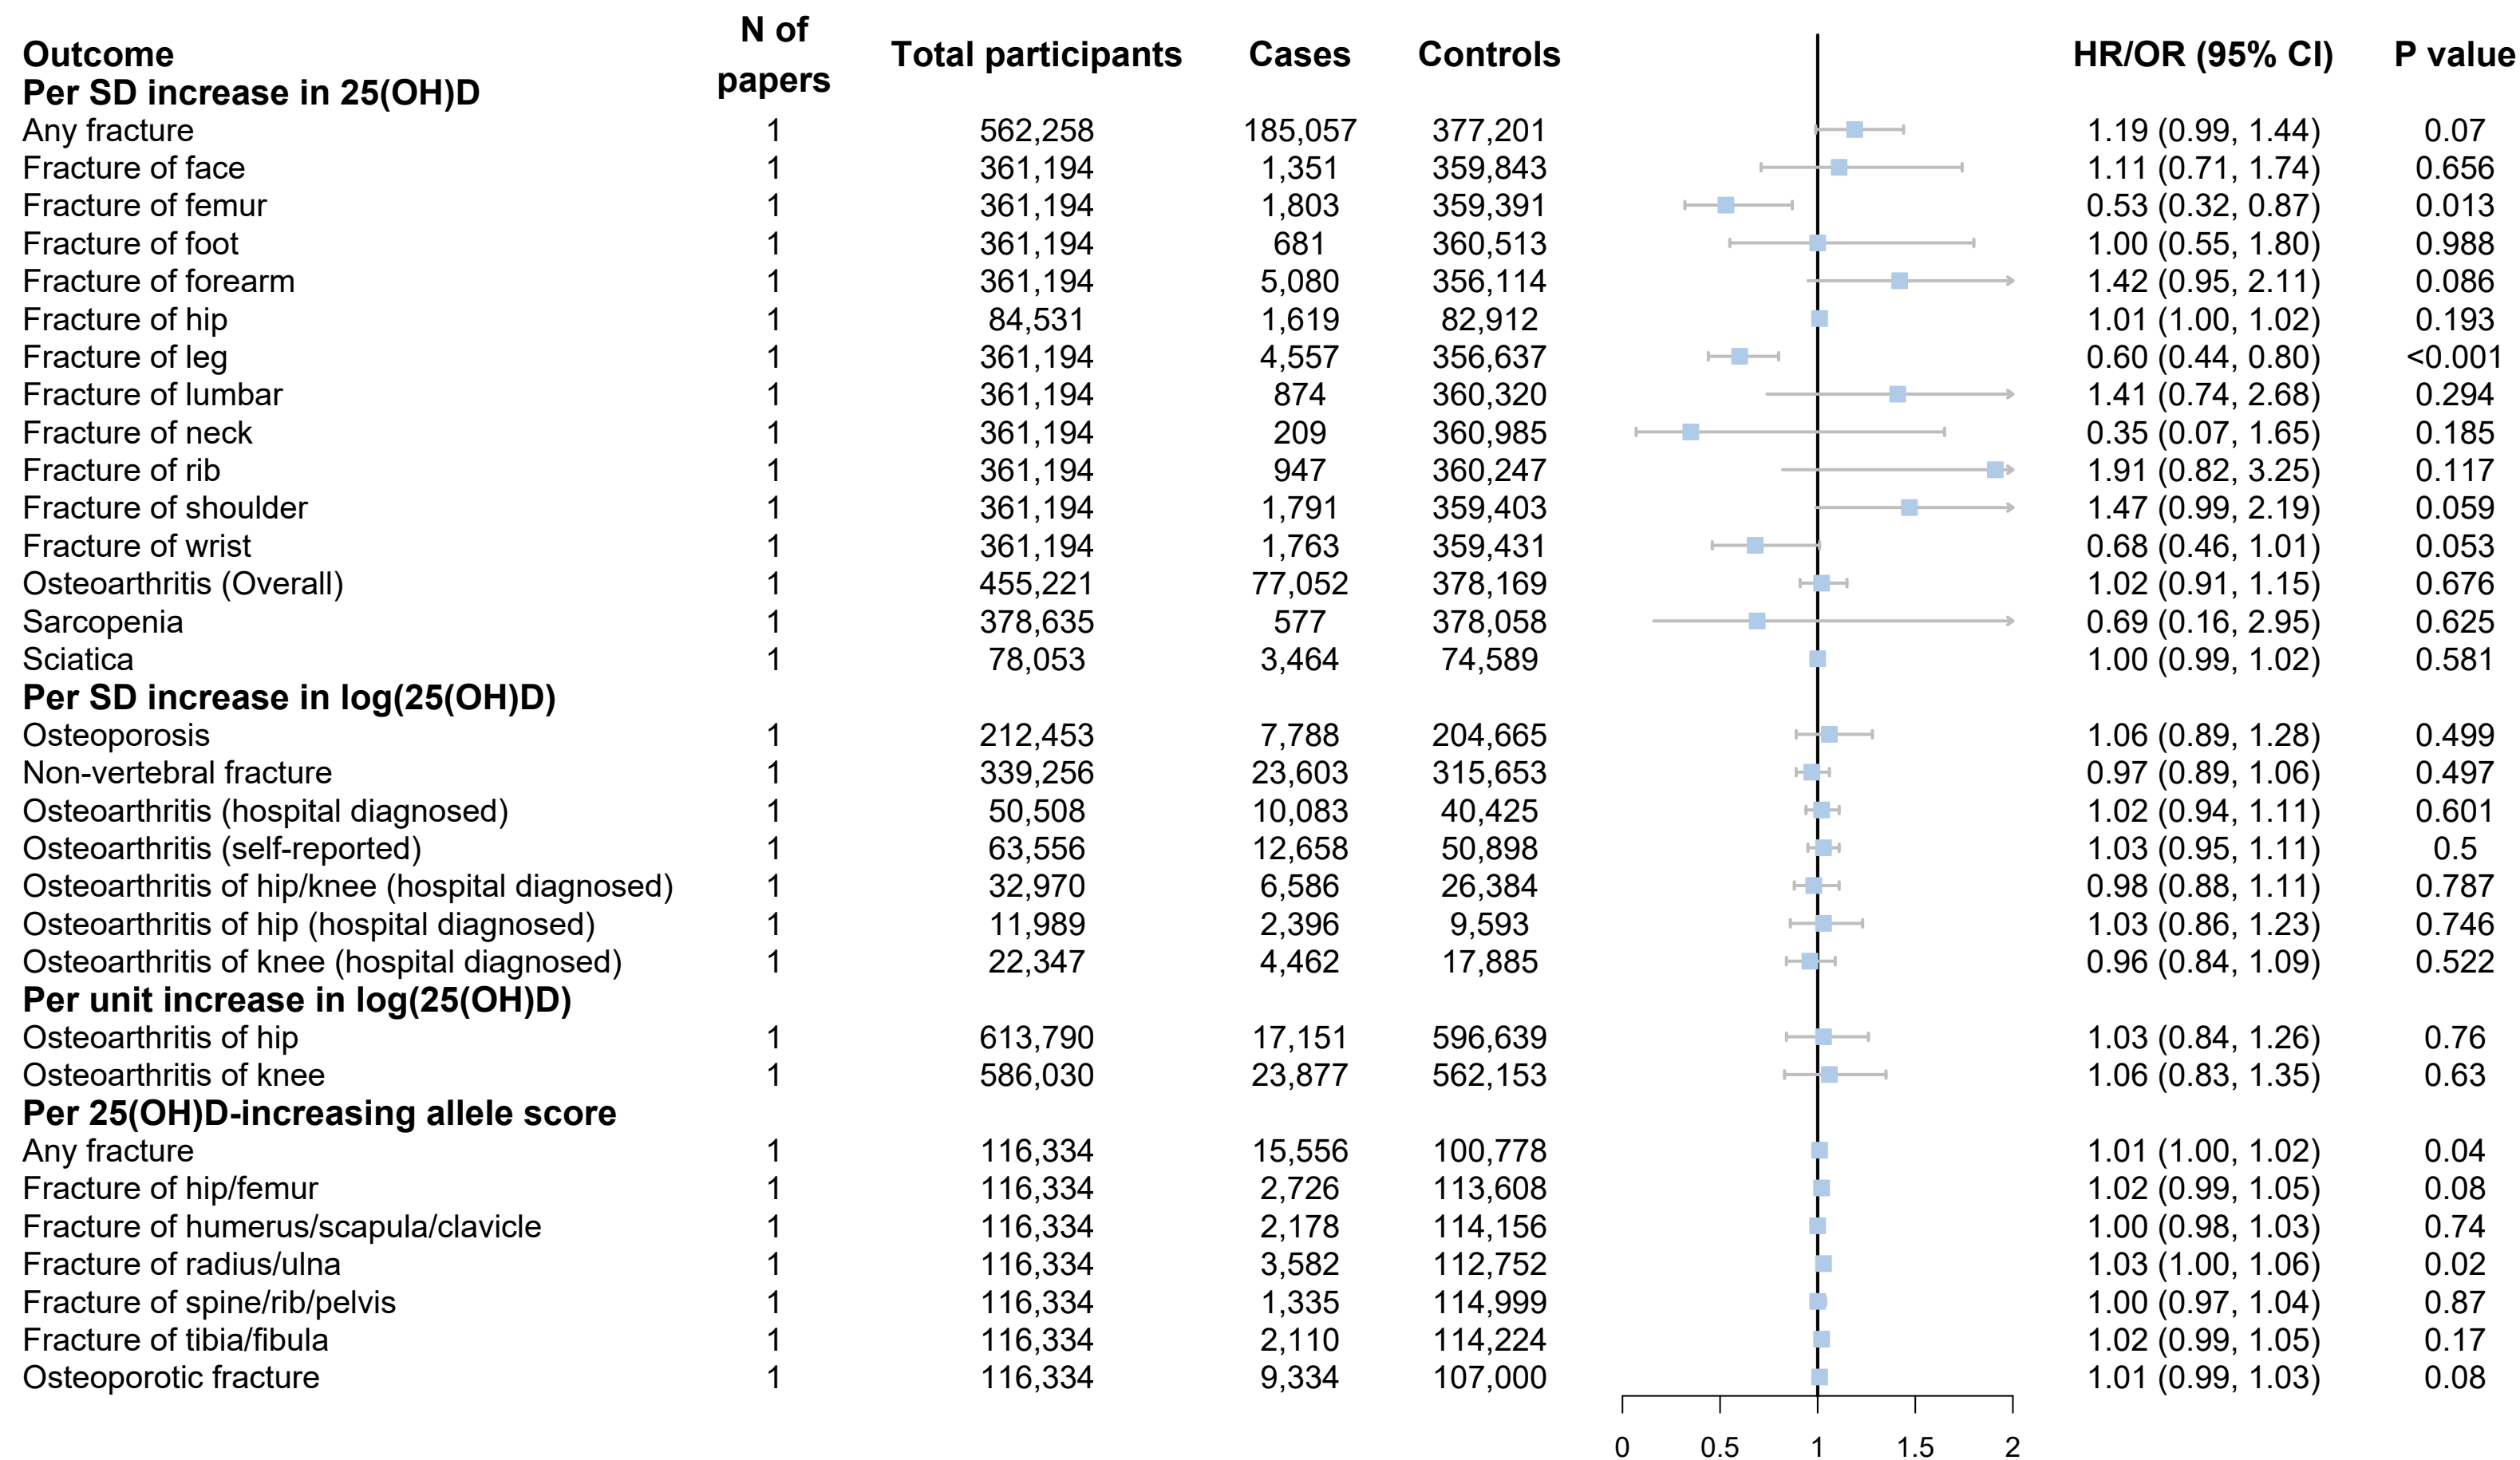

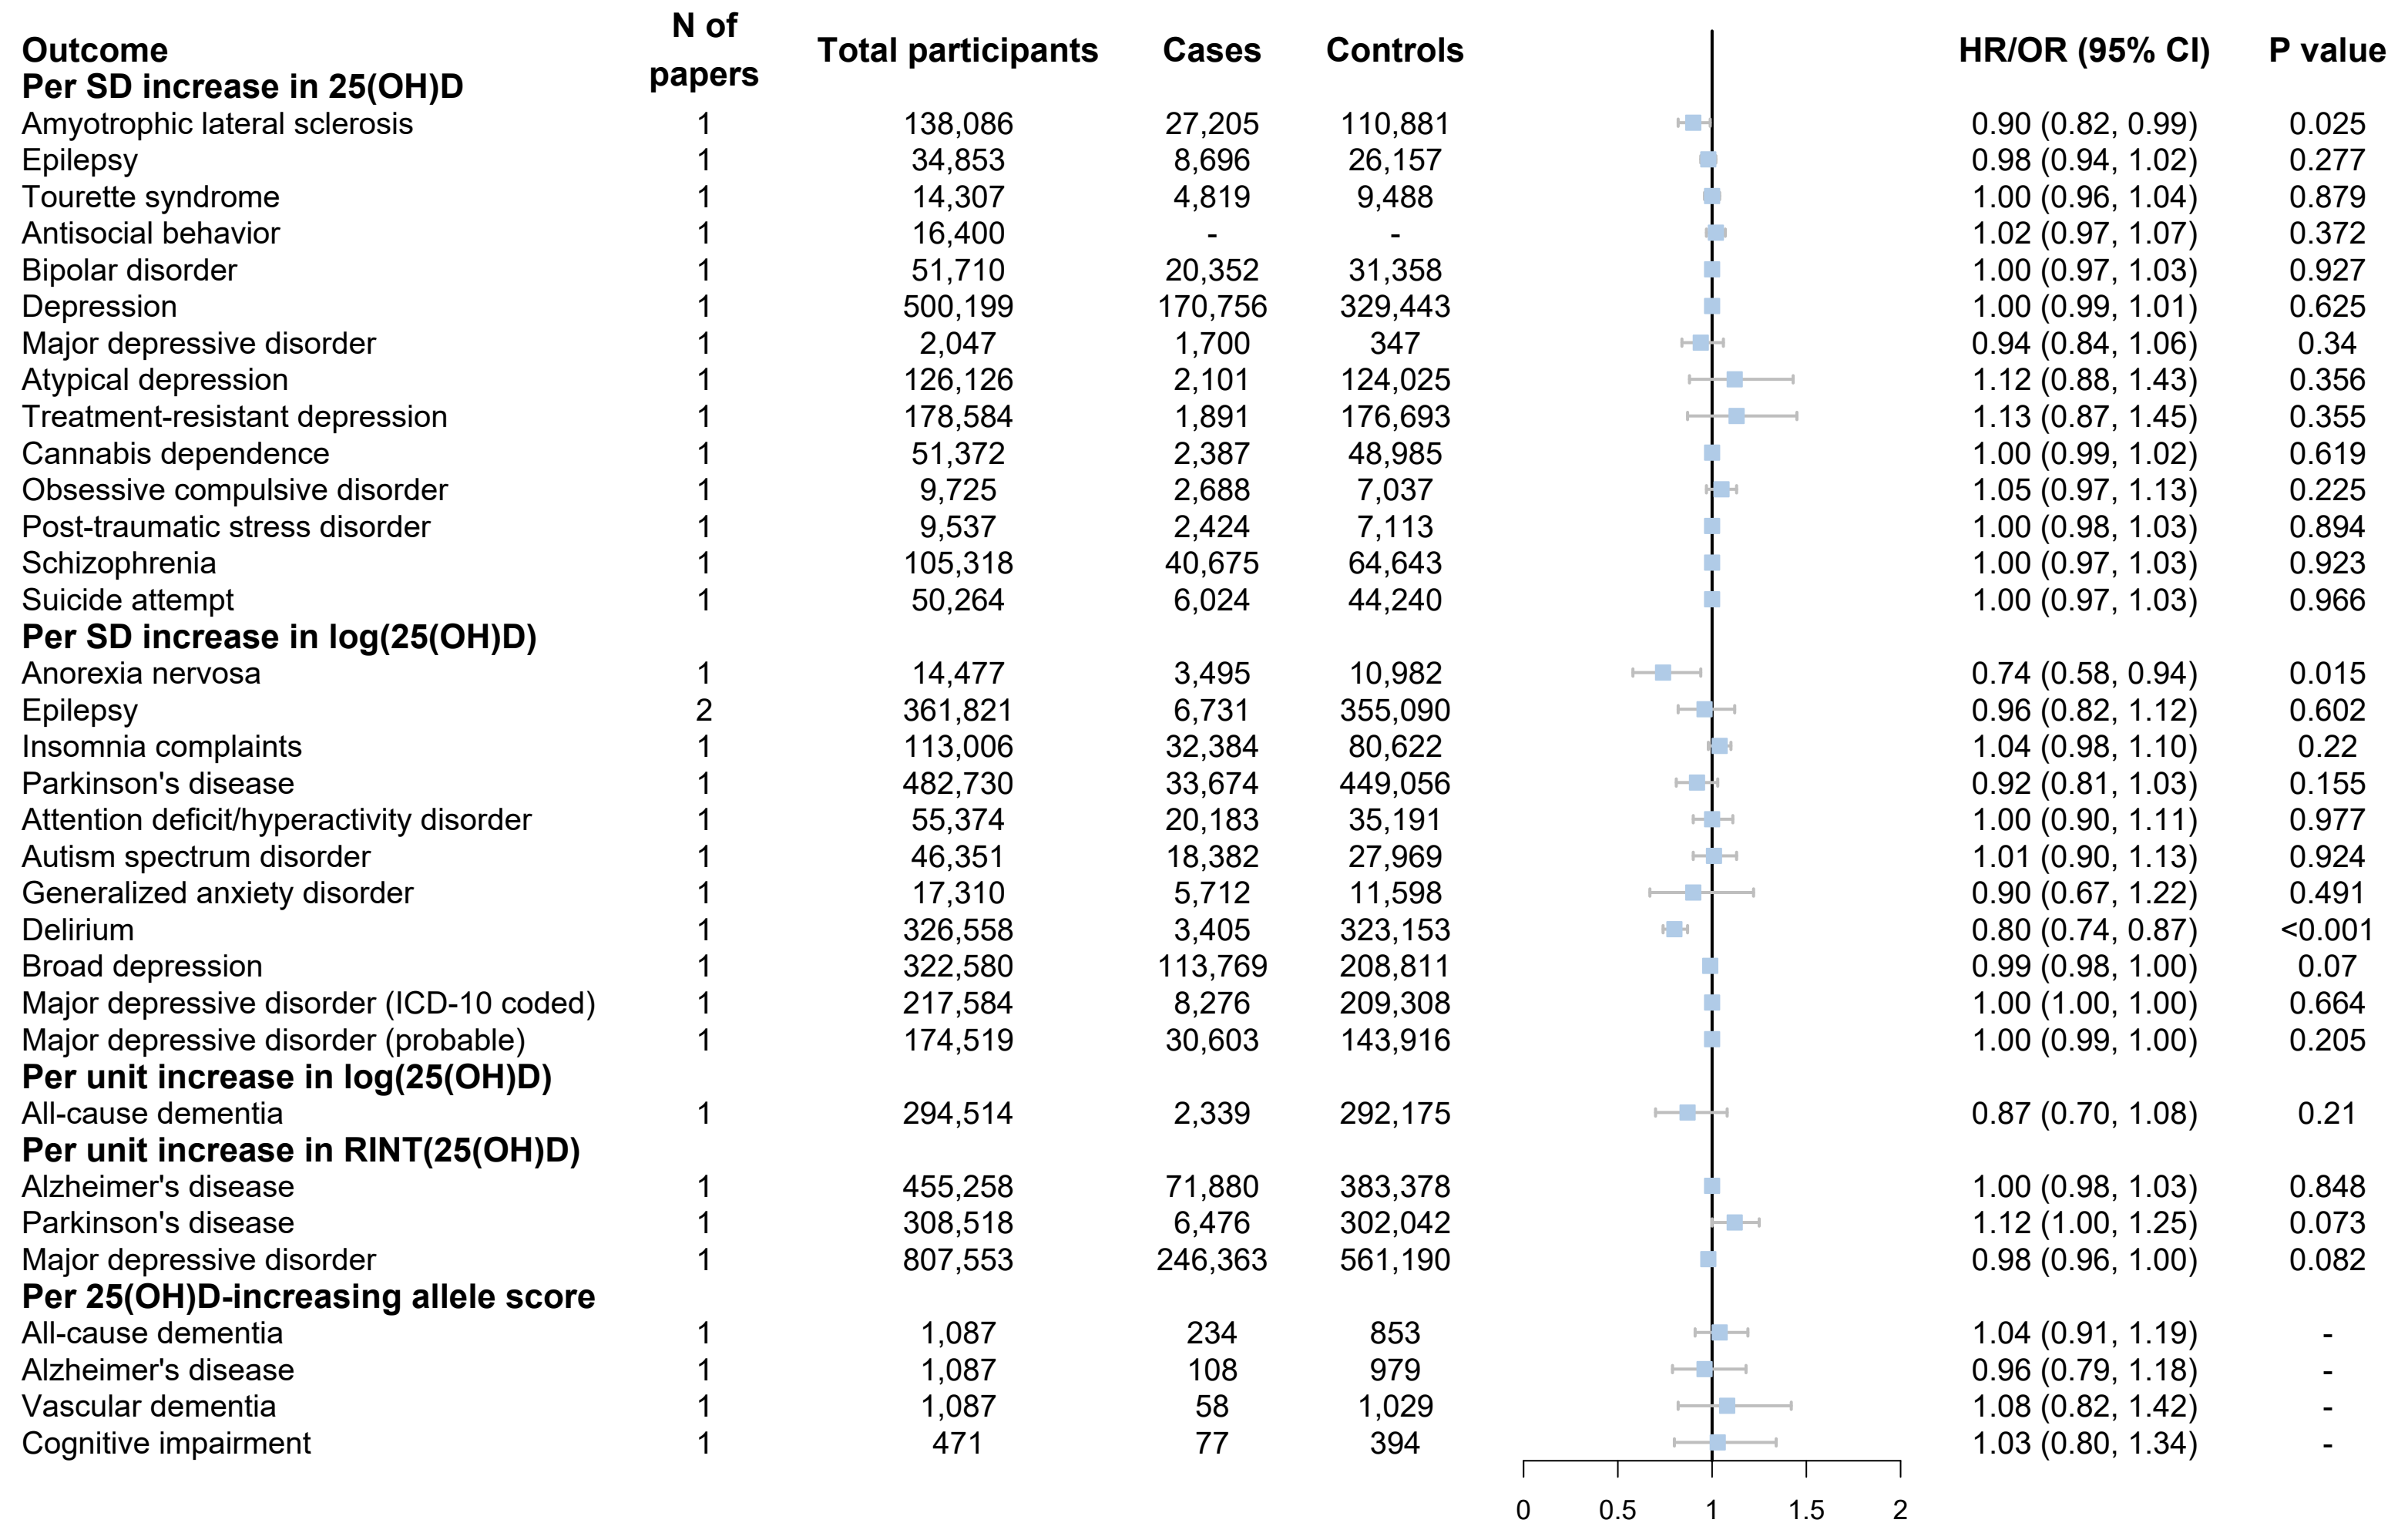

| <b>A. Cancer incidence</b>                  |                    |                           |              |                 |  |                       |                |
|---------------------------------------------|--------------------|---------------------------|--------------|-----------------|--|-----------------------|----------------|
| <b>Outcome</b>                              | <b>N of papers</b> | <b>Total participants</b> | <b>Cases</b> | <b>Controls</b> |  | <b>HR/OR (95% CI)</b> | <b>P value</b> |
| <b>Per 25 nmol/L increase in 25(OH)D</b>    |                    |                           |              |                 |  |                       |                |
| Any cancer                                  | 2                  | 334,087                   | 50,140       | 283,947         |  | 1.03 (0.88, 1.20)     | 0.748          |
| Breast cancer (Overall)                     | 3                  | 528,586                   | 136,240      | 392,346         |  | 1.01 (0.96, 1.06)     | 0.704          |
| Breast cancer (ER-negative)                 | 1                  | 127,442                   | 21,468       | 105,974         |  | 1.02 (0.90, 1.16)     | 0.75           |
| Breast cancer (ER-positive)                 | 1                  | 175,475                   | 69,501       | 105,974         |  | 1.00 (0.94, 1.07)     | 0.99           |
| Lung cancer (Overall)                       | 4                  | 374,197                   | 15,406       | 358,791         |  | 1.03 (0.90, 1.18)     | 0.702          |
| Lung cancer (Adenocarcinoma)                | 2                  | 74,673                    | 3,993        | 70,680          |  | 0.99 (0.77, 1.29)     | 0.956          |
| Lung cancer (Squamous cell)                 | 2                  | 74,560                    | 3,687        | 70,873          |  | 0.93 (0.71, 1.22)     | 0.607          |
| Lung cancer (Small cell)                    | 1                  | 54,580                    | 90           | 54,490          |  | 0.58 (0.12, 2.69)     | 0.48           |
| Lung cancer (Others/Unknown subtypes)       | 1                  | 54,580                    | 256          | 54,324          |  | 2.22 (0.86, 5.75)     | 0.1            |
| Colorectal cancer (Overall)                 | 3                  | 325,472                   | 21,359       | 304,113         |  | 0.97 (0.86, 1.10)     | 0.671          |
| Colorectal cancer (Colon)                   | 1                  | 19,357                    | 7,678        | 11,679          |  | 0.90 (0.73, 1.11)     | 0.33           |
| Colorectal cancer (Distal colon)            | 1                  | 15,033                    | 3,354        | 11,679          |  | 0.97 (0.73, 1.28)     | 0.83           |
| Colorectal cancer (Proximal colon)          | 1                  | 15,864                    | 4,185        | 11,679          |  | 0.83 (0.64, 1.07)     | 0.14           |
| Colorectal cancer (Rectal)                  | 1                  | 14,462                    | 2,783        | 11,679          |  | 0.93 (0.68, 1.26)     | 0.64           |
| Gastric and oesophageal Cancer              | 1                  | 265,597                   | 959          | 264,638         |  | 0.72 (0.50, 1.05)     | 0.09           |
| Oesophageal cancer (Adenocarcinoma)         | 1                  | 21,271                    | 4,112        | 17,159          |  | 0.62 (0.31, 1.24)     | -              |
| Pancreatic cancer                           | 2                  | 268,973                   | 2,396        | 266,577         |  | 1.26 (0.84, 1.91)     | 0.267          |
| Prostate cancer (Overall)                   | 3                  | 439,295                   | 100,839      | 338,456         |  | 0.99 (0.93, 1.05)     | 0.78           |
| Prostate cancer (Advanced)                  | 2                  | 90,644                    | 19,612       | 71,032          |  | 1.04 (0.92, 1.17)     | 0.531          |
| Ovarian cancer (Overall)                    | 1                  | 265,669                   | 1,031        | 264,638         |  | 1.13 (0.76, 1.68)     | 0.57           |
| Ovarian cancer (Serous)                     | 1                  | 27,482                    | 5,828        | 21,654          |  | 0.79 (0.50, 1.25)     | -              |
| Ovarian cancer (Others)                     | 1                  | 23,258                    | 1,604        | 21,654          |  | 0.89 (0.56, 1.41)     | -              |
| Endometrial cancer (Overall)                | 1                  | 266,576                   | 1,938        | 264,638         |  | 0.88 (0.66, 1.16)     | 0.38           |
| Kidney cancer                               | 1                  | 265,650                   | 1,012        | 264,638         |  | 1.27 (0.80, 2.01)     | 0.31           |
| Lymphoid cancer                             | 1                  | 268,214                   | 3,576        | 264,638         |  | 1.13 (0.90, 1.40)     | 0.29           |
| Neuroblastoma                               | 1                  | 4,881                     | 1,627        | 3,254           |  | 0.76 (0.47, 1.21)     | 0.24           |
| Skin cancer (Melanoma)                      | 2                  | 303,473                   | 15,632       | 287,841         |  | 0.91 (0.81, 1.03)     | 0.149          |
| Skin cancer (Non-melanoma)                  | 1                  | 97,849                    | 8,643        | 89,206          |  | 1.11 (0.91, 1.35)     | -              |
| <b>Per SD increase in 25(OH)D</b>           |                    |                           |              |                 |  |                       |                |
| Any cancer                                  | 1                  | 218,792                   | 38,036       | 180,756         |  | 1.01 (0.97, 1.05)     | 0.68           |
| Barrett's oesophagus and oesophageal cancer | 1                  | 27,438                    | 10,279       | 17,159          |  | 0.98 (0.85, 1.14)     | 0.98           |
| Barrett's oesophagus                        | 1                  | 23,326                    | 6,167        | 17,159          |  | 1.00 (0.84, 1.18)     | 0.97           |
| Oesophageal cancer                          | 1                  | 21,271                    | 4,112        | 17,159          |  | 0.97 (0.78, 1.20)     | 0.76           |
| Lung cancer (Overall)                       | 1                  | 85,716                    | 29,266       | 56,450          |  | 1.00 (0.97, 1.03)     | 0.844          |
| Colorectal cancer (Overall)                 | 2                  | 164,377                   | 27,240       | 137,137         |  | 1.00 (0.99, 1.01)     | 0.975          |
| Ovarian cancer (Overall)                    | 1                  | 66,450                    | 25,509       | 40,941          |  | 0.89 (0.82, 0.96)     | 0.02           |
| Ovarian cancer (Clear cell)                 | 1                  | 42,307                    | 1,366        | 40,941          |  | 0.87 (0.64, 1.18)     | 0.36           |
| Ovarian cancer (Endometrioid)               | 1                  | 43,751                    | 2,810        | 40,941          |  | 0.94 (0.77, 1.15)     | 0.55           |
| Ovarian cancer (High-grade serous)          | 1                  | 53,978                    | 13,037       | 40,941          |  | 0.92 (0.82, 1.03)     | 0.15           |
| Ovarian cancer (Low-grade serous)           | 1                  | 41,953                    | 1,012        | 40,941          |  | 0.99 (0.71, 1.37)     | 0.94           |
| Ovarian cancer (Mucinous)                   | 1                  | 42,358                    | 1,417        | 40,941          |  | 0.94 (0.74, 1.18)     | 0.59           |
| Uterus cancer                               | 1                  | 87,427                    | 366          | 87,061          |  | 1.01 (0.99, 1.03)     | 0.299          |
| Endometrial cancer (Overall)                | 1                  | 121,885                   | 12,906       | 108,979         |  | 0.95 (0.83, 1.09)     | 0.46           |
| Endometrial cancer (Endometrioid)           | 1                  | 54,884                    | 8,758        | 46,126          |  | 0.93 (0.81, 1.08)     | 0.36           |
| Endometrial cancer (Non-endometrioid)       | 1                  | 36,677                    | 1,230        | 35,447          |  | 1.02 (0.76, 1.36)     | 0.91           |
| Thyroid cancer                              | 1                  | 87,382                    | 321          | 87,061          |  | 0.99 (0.96, 1.02)     | 0.562          |
| Glioma (Overall)                            | 1                  | 30,657                    | 12,488       | 18,169          |  | 0.99 (0.86, 1.15)     | 0.933          |
| Glioma (Glioblastoma)                       | 1                  | 24,352                    | 6,183        | 18,169          |  | 0.88 (0.71, 1.05)     | 0.17           |
| Glioma (Non-glioblastoma)                   | 1                  | 23,989                    | 5,820        | 18,169          |  | 1.11 (0.92, 1.34)     | 0.264          |
| Kidney cancer                               | 1                  | 96,499                    | 301          | 96,198          |  | 1.00 (0.99, 1.01)     | 0.964          |
| Bladder cancer                              | 1                  | 96,499                    | 366          | 96,133          |  | 1.00 (0.99, 1.02)     | 0.576          |
| Skin cancer (Overall)                       | 1                  | 87,956                    | 895          | 87,061          |  | 1.02 (0.99, 1.04)     | 0.147          |
| Skin cancer (Basal cell carcinoma)          | 1                  | 293,989                   | 14,940       | 279,049         |  | 1.16 (1.04, 1.28)     | 0.01           |
| Skin cancer (Squamous cell carcinoma)       | 2                  | 629,914                   | 7,804        | 622,110         |  | 1.00 (1.00, 1.00)     | 1              |
| Skin cancer (In situ)                       | 1                  | 87,181                    | 342          | 86,839          |  | 1.01 (0.99, 1.03)     | 0.458          |
| Leukemia                                    | 1                  | 87,259                    | 198          | 87,061          |  | 1.01 (1.00, 1.03)     | 0.098          |
| Multiple myeloma                            | 1                  | 37,021                    | 7,717        | 29,304          |  | 1.08 (0.84, 1.40)     | 0.54           |
| Non-Hodgkin lymphoma                        | 1                  | 87,216                    | 155          | 87,061          |  | 1.00 (0.98, 1.03)     | 0.873          |
| <b>Per SD increase in log(25(OH)D)</b>      |                    |                           |              |                 |  |                       |                |
| Breast cancer (Overall)                     | 2                  | 98,969                    | 7,209        | 91,760          |  | 0.98 (0.92, 1.05)     | 0.593          |
| Lung cancer (Overall)                       | 1                  | 212,453                   | 4,050        | 208,403         |  | 1.03 (0.78, 1.36)     | 0.84           |
| Oral and oropharyngeal cancer               | 1                  | 348,225                   | 5,718        | 342,507         |  | 0.95 (0.74, 1.22)     | 0.68           |
| Oral cancer                                 | 1                  | 345,501                   | 2,994        | 342,507         |  | 0.86 (0.70, 1.07)     | 0.18           |
| Oropharyngeal cancer                        | 1                  | 345,231                   | 2,724        | 342,507         |  | 1.03 (0.69, 1.53)     | 0.87           |
| Oesophageal cancer (Overall)                | 1                  | 518,347                   | 1,866        | 516,481         |  | 0.71 (0.52, 0.99)     | 0.041          |
| Gastric cancer                              | 1                  | 202,308                   | 6,563        | 195,745         |  | 0.90 (0.68, 1.20)     | 0.477          |
| Colorectal cancer (Overall)                 | 1                  | 202,807                   | 7,062        | 195,745         |  | 1.14 (0.97, 1.35)     | 0.112          |
| Hepatocellular carcinoma                    | 1                  | 197,611                   | 1,866        | 195,745         |  | 0.90 (0.57, 1.41)     | 0.64           |
| Biliary tract cancer                        | 1                  | 196,084                   | 339          | 195,745         |  | 0.74 (0.39, 1.38)     | 0.344          |
| Pancreatic cancer                           | 1                  | 196,187                   | 442          | 195,745         |  | 1.15 (0.56, 2.36)     | 0.696          |
| Ovarian cancer (Overall)                    | 1                  | 90,451                    | 720          | 89,731          |  | 0.65 (0.38, 1.12)     | 0.123          |
| Endometrial cancer (Overall)                | 1                  | 90,730                    | 999          | 89,731          |  | 0.91 (0.57, 1.44)     | 0.685          |
| Cervical cancer                             | 1                  | 90,336                    | 605          | 89,731          |  | 0.69 (0.41, 1.15)     | 0.157          |
| Prostate cancer (Overall)                   | 1                  | 109,347                   | 5,408        | 103,939         |  | 0.85 (0.67, 1.07)     | 0.163          |
| Hematological malignancy                    | 1                  | 212,453                   | 1,236        | 211,217         |  | 1.11 (0.74, 1.65)     | 0.612          |
| <b>Per unit increase in log(25(OH)D)</b>    |                    |                           |              |                 |  |                       |                |
| Colorectal cancer (Distal colon)            | 1                  | -                         | -            | 22,848          |  | 0.74 (0.37, 1.50)     | 0.41           |
| Colorectal cancer (Proximal colon)          | 1                  | -                         | -            | 22,848          |  | 1.16 (0.35, 3.84)     | 0.805          |
| Colorectal cancer (Rectal)                  | 1                  | -                         | -            | 22,848          |  | 1.21 (0.34, 4.29)     | 0.765          |
| Pancreatic ductal adenocarcinoma            | 1                  | 15,824                    | 8,769        | 7,055           |  | 1.13 (0.71, 1.80)     | 0.6            |
| Ovarian cancer (Low malignant potential)    | 1                  | 44,044                    | 3,103        | 40,941          |  | 1.02 (0.43, 2.42)     | 0.96           |
| <b>Per unit increase in RINT(25(OH)D)</b>   |                    |                           |              |                 |  |                       |                |
| Colorectal cancer (Colon)                   | 1                  | 28,880                    | 4,281        | 24,599          |  | 0.91 (0.76, 1.09)     | 0.289          |
| Colorectal cancer (Rectal)                  | 1                  | 27,782                    | 3,183        | 24,599          |  | 0.80 (0.55, 1.15)     | 0.229          |

| <b>B. Cancer survival</b>                                       |                    |                           |              |                 |  |                       |                |
|-----------------------------------------------------------------|--------------------|---------------------------|--------------|-----------------|--|-----------------------|----------------|
| <b>Outcome</b>                                                  | <b>N of papers</b> | <b>Total participants</b> | <b>Cases</b> | <b>Controls</b> |  | <b>HR/OR (95% CI)</b> | <b>P value</b> |
| <b>Per SD increase in log(25(OH)D)</b>                          |                    |                           |              |                 |  |                       |                |
| Overall survival in patients with breast cancer                 | 1                  | 37,954                    | 2,900        | 35,054          |  | 1.00 (0.81, 1.23)     | 0.985          |
| Overall survival in patients with breast cancer (ER-positive)   | 1                  | 23,059                    | 1,333        | 21,726          |  | 1.09 (0.82, 1.45)     | 0.542          |
| <b>Per 25(OH)D-increasing allele score</b>                      |                    |                           |              |                 |  |                       |                |
| Disease-free survival in patients with hepatocellular carcinoma | 1                  | 98                        | 46           | 52              |  | 1.78 (0.24, 13.31)    | -              |
| Overall survival in patients with hepatocellular carcinoma      | 1                  | 100                       | 30           | 70              |  | 0.36 (0.02, 5.41)     | -              |

0 0.5 1 1.5 2



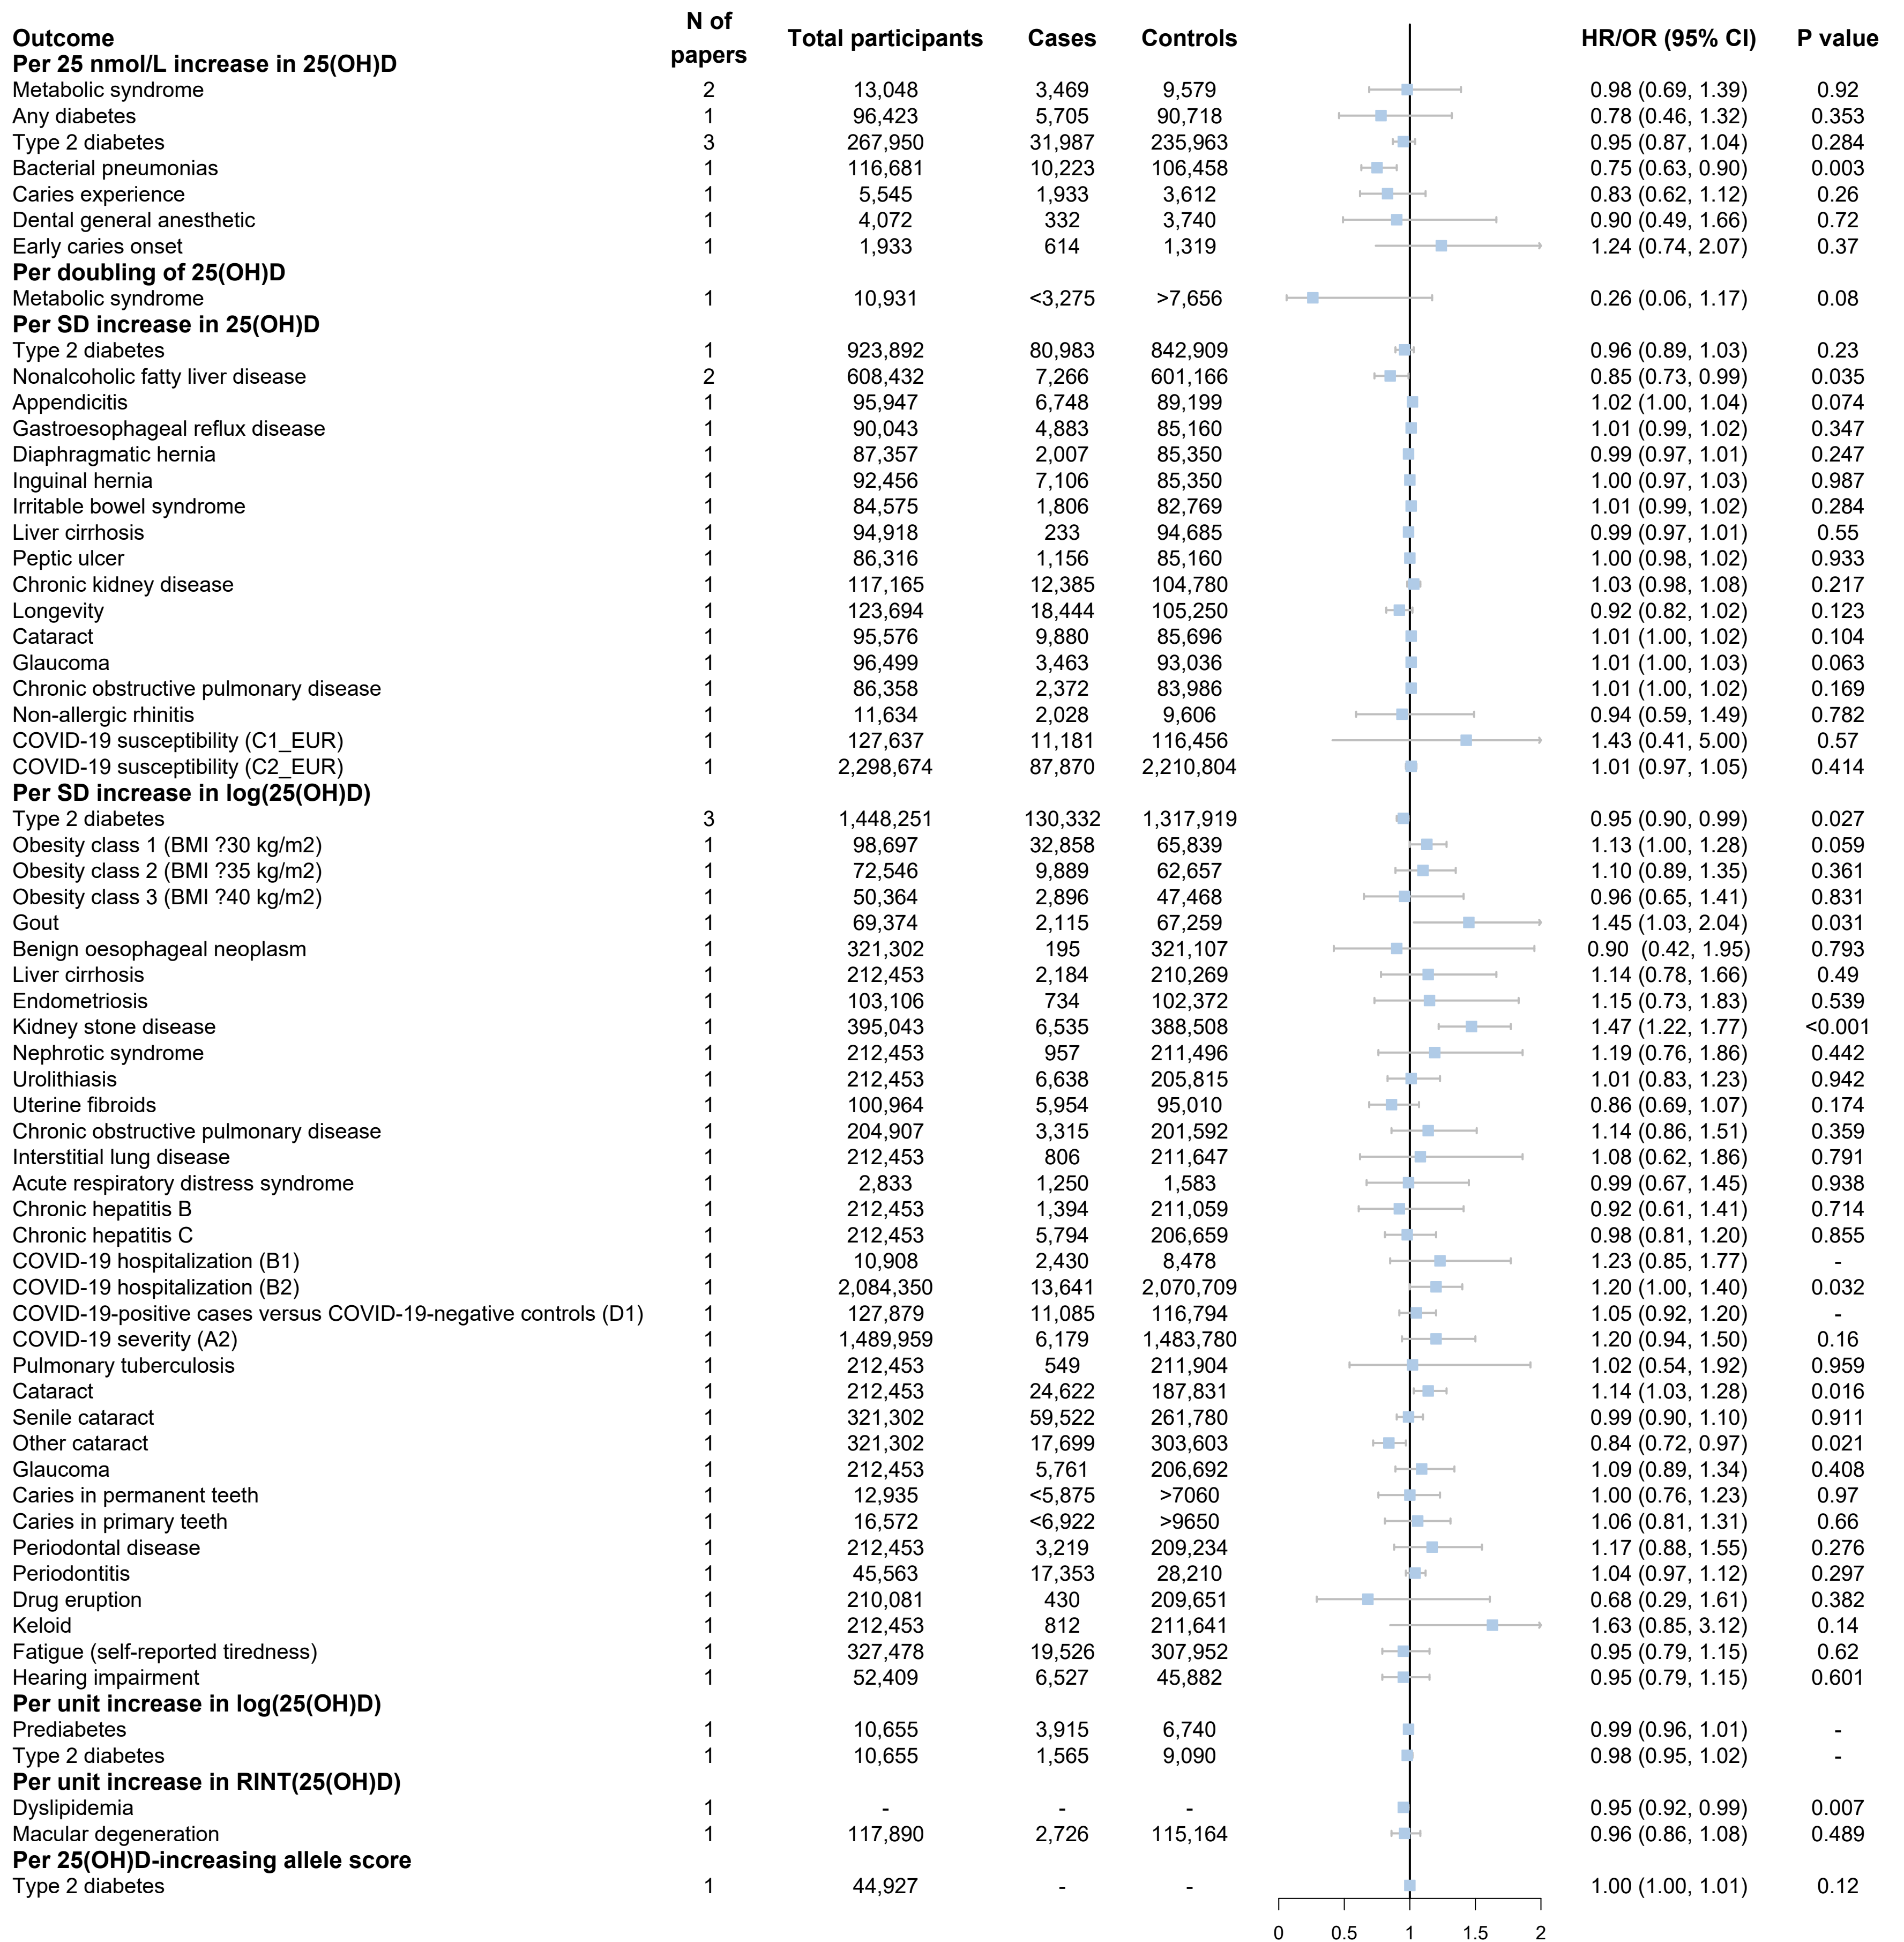

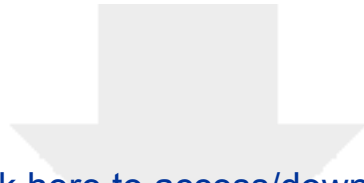

Click here to access/download  
**Supplementary material**  
Supplemental tables and figures.docx

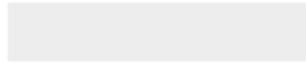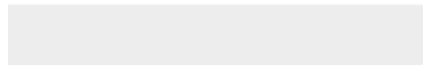

Supplement: 10654_2023_1075_MOESM3_ESM.pdf [file 10654_2023_1075_MOESM3_ESM.pdf]
